# Supplementary material for: Avalanche Impact Pressures on Structures with Upstream Pile-Up/Accumulation Zones of Compacted Snow
Source: Copernicus journal article supplement (doi:10.5194/nhess-2018-154), 2018-09-03
Supplement: Supplementary file [file nhess-2018-154-AC8-supplement.pdf]

## **Avalanche Impact Pressures on Structures with Upstream Pile- Up/Accumulation Zones of Compacted Snow. Reply to Comments of the Four Reviewers**

**General: We thank all four reviewers for the careful reading of the manuscript. The most serious criticism came from Reviewer 3 (Thierry Faug) who maintains (1) the manuscript does not adequately cite previous work on “pile-up” based on the analytical shock approach and (2) the presented approach, especially the statement of the mass balance at pile-up, does not agree with the existing publications.**

**To address these comments we have:**

- (1) added an entire section detailing the difference between the application of the work-energy theorem and the “shockwave” approach, see “Comparison of the work-energy approach to “shockwave” models”.**
- (2) We have cited the existing literature. We have added two figures and a comparison table.**

**Based on our results, we show there a significant differences between the two approaches and why we think the “shockwave” approach has serious deficiencies. We come to the conclusion that the “shockwave” approach cannot model avalanche “pile-up”, rather a “stream” of avalanche snow that hits the structure and is reflected. Subsequently, it is not suitable to the problem of pressures induced by slow moving avalanches. We explain our reasoning using numerical examples to demonstrate the difference in the two approaches. We emphasize that this is an extremely significant result and will have many consequences for avalanche mitigation. The analogy to the propagation of an “elastic” wave to describe pile-up, a completely plastic process, does not satisfy our conditions for energy conservation.**

**Based on these results we have reformulated the conclusions with more emphasis on the model comparison. The majority of the original conclusions hold, but we wanted to stress the inadequacies of existing experimental set-ups.**

**Other major revisions included**

- (1) Rephrasing the abstract and introduction**
- (2) Added a notation Table with a list of all variables.**
- (3) Removing the “dot” notation to describe changes. We use only the large “ $\Delta$ ”, for example for the change in kinetic energy, or change in momentum.**
- (4) Redid all the Figures, according to suggestions of the reviewers.**

**We modified the examples, but would be happy to include more modifications if necessary, should the reviewers request more clarification.**

### **Anonymous Referee #1**

Received and published: 9 October 2018

The discussion paper titled “Avalanche Impact Pressures on Structures with Upstream Pile-Up/Accumulation Zones of Compacted Snow” by Bartelt et al. proposes a very interesting approach for dealing with the interaction between snow avalanche flow and isolated obstacles. The model considers that the deceleration of the snow mass turns into impact pressure against the obstacle. The paper clearly states its limitations: in particular, the considered geometry is simple, and an ideal rectangular dead zone is assumed (which is not real for narrow obstacles). In addition, the obstacle is supposed rigid, thus the dynamic effects are not considered. Nevertheless, the proposed mechanical model is worthy of attention, with particular reference to the engineering problems in mountain areas.

### Specific comments

1. The authors state that cohesive flows with strong bonding between the snow clumps have the property  $h_{\text{up}} > h$ . In this case, a compaction of the impacting mass occurs, rather than a pile-up. A short comment is probably expected. → We write, “Cohesive flows with strong bonding between the snow clumps reduce the ability of the avalanche at impact to increase the pile-up height” Yes, it is interesting that “compaction” and “pile-up” can have different meanings. For us, stopping mass is “pile-up”, even if it does not raise the height.

2. Referring to the analytical model, as well detailed in the discussion paper, the region  $\text{up}$  has length  $V_{\text{up}}(t)$ , while the resulting pile-up zone has length  $S_{\text{up}}(t)$ . The authors indicate the braking distance as  $d_{\text{br}}(t)$  (p.4 line 11). From the sketch in Figure 1, it results that the mean braking distance is the distance between the centers of mass of the compacting and the pile-up zones, i.e.  $d_{\text{br}}(t) = 12hV_{\text{up}}(t) - S_{\text{up}}(t)$ :

Why do the authors adopt a different symbol for the braking distance in Eqn. (5), i.e.  $\dot{d}_{\text{br}}$ ? It is expected that  $\dot{d}_{\text{br}}$  is the variation of the braking distance at different times, say  $t$  and  $t + \Delta t$ . In addition, the authors should also clarify what do they intend with  $d_{\text{br}}(t)$ . It is expected that this term is the time derivative of

the braking distance, i.e.,  $d_{\text{br}}(t) = \lim_{\Delta t \rightarrow 0} \frac{d_{\text{br}}(t + \Delta t) - d_{\text{br}}(t)}{\Delta t}$ :

Can the author better explain what do they intend with braking speed? Is it the ratio between the braking distance and  $\Delta t$ ? Probably, it would be better to indicate the braking speed with a symbol without the dot. → Yes, we agree. We deleted the dot  $\dot{d}$  notation entirely from the paper. It is not necessary. It simplifies the algebra (because we are always dividing by  $dt$ ). When talking about the braking we should keep it simple and talk only about the braking distance.

3. Observing Figure 3, it seems that the shear traction force is directed against the snow avalanche flow, i.e., a negative pressure is acting on the obstacle. Have I well understood? → The traction applies a force on the pile-up zone. This force must be taken-up by the obstacle. That is, there is an equal and opposite reaction on the obstacle because of the traction.

4. Can the author include some references about the lateral requirements resistance of bridge guardrails? European norms (say EN 1317) relate to performance classes based on impact speed, angle and vehicle mass, rather than impact loadings. → We concentrated on the Swiss norms which are distributed by the ASTRA. We are simply not familiar with EU norms. We will make a literature search when the other issues are cleared up.

5. Limiting the attention to the failure of the guardrail, any impact pressure larger than the one that caused the observed damage would cause the same damage. However, the presence of further elements that were not destroyed by the avalanche can help in estimating an upper limit of the impact pressure. Have the authors found other elements that can help in estimating an upper limit of the impact pressure? → Unfortunately not. Or it would be very speculative. We took pictures of the damage and made a plasticity analysis, but did not want to introduce that into the paper. However, if the reviewer insists we can provide more details of the plasticity analysis.

### Minor observations

- $S_{\text{up}}$  in Eqn. (5) → CHANGED
- The paper “Formation of levees and en-echelon shear planes during snow avalanche run-out” by Bartelt et al. dates back to 2012, rather than 2017. → CHANGED

### Anonymous Referee #2

Received and published: 15 October 2018

The manuscript "Avalanche Impact Pressures on Structures with Upstream Pile-Up/Accumulation Zones of Compacted Snow" by Bartelt et al. discusses an approach to calculate/estimate pressures arising from avalanches hitting stationary obstacles. It presents an interesting mechanical model, the theoretical basis thereof, applied examples and states the limits and shortfalls. The setup of the paper is clear and follows a logical structure. The model seems to be ready to be included in dynamical avalanche models once the necessary basic changes (like variable densities) are implemented.

This presents a very promising and needed approach to discuss impact pressures on obstacles.

Main comments:

- The compaction density  $\rho_{\omega}$  lacks the necessary discussion. Since it is one of the main driving factors for the results (e.g. fig 2 / 4) it needs a better justification.  $\rho_{\omega}$  is currently not (yet) available from models, and reliable observations are not easily accessible. The other parameters of this approach can be handled by models or observations. So how do the authors suggest to handle this important (tuning) parameter? In the paper the model is sometimes tested with three (arbitrary, if plausible) densities, and sometimes set to a fixed value (e.g. label fig 9). Especially in the case for the Mittelbeda avalanche it is (seemingly) picked at random. This needs to be better justified with observations, or at least the reasoning for this specific value needs to be shown.

→ Yes, this is a problem. The only really good measurements of the compaction density is contained in the work of Thibert, which we now cite in the text. He measured a compaction density at Col de Lautaret of 540 kg/m<sup>3</sup>. Perhaps the paper should be seen as a plea for more measurements of compaction densities. We really don't have an answer.

- Figures 1 and 3 need to be improved. Figure 1 has separate compacting zone CZ and avalanche core AC in the upper panel. Then in the lower panel CZ and AC are the same, however the  $v$  is denoted with  $t + \Delta t$ . I somehow expect there to be a CZ( $t + \Delta t$ ) and the same for AC. Or if the authors try to show the "steady" state reached at end of compaction, remove the CZ in the lower panel and make it more clear in the label. The right panel of figure 3 contains basically the same (simplified) information as figure 1, adding only information about stress. Presenting the side view in the same manner as the top view leads to confusion. I suggest either to include the information about stress in fig 1 and reference it, or rotate the right panel of fig 3 by 90 deg to make the "side view" clearer.

→ We have completely redone the figures according to the specifications of the reviewer. Furthermore, we have improved our notation. We have removed references to "steady" since it is a dynamic process.

Comments:

- On p.4 / l. 4 it is stated "The pile-up height is generally...". How do the authors come to this conclusion? On p.2 / l. 25 part of this is presented as an assumption...

→ Yes, it is an assumption (a good one, we have never seen a pile-up height smaller than the flow). We state that it is one of the many assumptions.

- I suggest moving sentence p.5 / l. 9-10 to the beginning paragraph of section 2. This would be beneficial to the reader wondering about other influencing factors right from the start of the discussion.

→ With all the changes, perhaps it reads better now.

Regarding SC1 by Peter Gauer: I suggest including a short remark about the discussed work in the introduction.

→ See above, entire section is now introduced.

- For easier readability I suggest moving p. 8 / l. 6-12 to the beginning of the section. The information that both cases "are motivated by..." observations is an important one. - P 9. / l. 5: Remove "somewhat". Very unspecific: either it is unusual or it is not unusual.

→ Removed

- Out of interest: what causes the drop in velocity in fig. 9. a) at approx. 42 seconds?  
→ In the simulations this is the end of the avalanche. In the RAMMS model, lower flow heights are associated with higher friction and therefore a decrease in velocity.. The last paragraph in the paper is extremely important to us – such questions cannot be answered without better observations and measurements.

Minor:

- Label fig. 4: givne -> given → CHANGED
  - P 9. / l. 6: between -> between → CHANGED
  - P 9. / l. 9: "at" missing between density and elevation → CHANGED
  - P 9. / l. 11: possibilty -> possibility → CHANGED
- All (obvious) typos are in section 4.3, seems to be avoidable by autocorrect.

Reviewer 3.

All the comments of reviewer 3 are addressed in the section "Comparison of the work-energy approach to "shockwave" models. We have come to conclusion that (1) the mass balance of the "shockwave" models and (2) the momentum balance of "shockwave" models do not model the "pile-up" process. We present a detailed comparison. We have serious doubts that the "shockwave" approach is correct.

## 1 General comment

The topic addressed by the authors is of utmost importance. The calculation of the impact force of avalanches on obstacles when a uid-to-solid transition occurs, thus forming stagnant (quasi-static) zone upstream of obstacles and traveling jumps, is a challenging question. Although a number of significant advances were made in the recent years (most of them are available along my report below), there remains a lot to do because of the complicated physics which takes place during dense flow/obstacle interaction. The present paper proposes an approach based on a (simple) \energy approach".

I read in detail the ideas developed by the authors. I must say that I have a number of major concerns about the theoretical part proposed by Perry Bartelt et al. The main reasons are (at least) the following:

The paper is first of all not free of misconceptions:

- the approach proposed starts with some equations that are pulled out of a hat (Eq. (3) for instance) or even wrong (Eq. (4)); this poses a serious problem because all the results presented in the rest of paper (virtual cases and practical case) depend on those confusing or awed equations stated at the beginning of the description of the model.
- I also found a couple of misleading statements (see the section specific comments below).

Moreover, I must say that the present study does ignore a number of important works done before on the topic. I thus fully agree with the short comment earlier proposed by Peter Gauer on this weak point of the paper.

Unlike referees 1 and 2, I cannot provide a positive feedback on the present study (see section Recommendation at the end of the present report).

I have taken time to write a rather detailed review in order to explain where the outcomes of the previous studies were relevant and could (not to say should) have been considered. I really invite the authors to read and consider the efforts made in the recent years by other researchers on the topic. In particular, they should demonstrate that their energy approach (ONCE CORRECTED) is superior to previous approaches mostly based on momentum conservation equation. At this stage, I did not go through the details of the examples/applications (section 4) because some equations used to draw the different plots and presented at the beginning of the paper are answered.

## 2 Specific comments

- abstract: "Existing methods to calculate snow avalanche impact pressures on rigid obstacles are based on the assumption of no upslope pile-up of snow behind the structure at impact." This sentence shall help the author to promote their model but it must be removed because this is a wrong statement! There are methods already published that make effort to address carefully the problem and the authors should not ignore them: see the references cited along my review

comments below.

- page 1, lines 18-19: why using this term "shape coefficient" for  $C_D$ ? In fluid mechanics  $C_D$  is the "drag coefficient". Here, the EU handbook edited by Tomas Johannesson et al. (2009) would merit citation. In particular, table 12.1 (page 107) provides recommendations for the values of  $C_D$ .

- page 2, lines 3-5: it is well-established that when granular flows impact walls, the formation of dead zones upstream of the obstacle is a key process that we need to include into the impact force calculation in order to predict the correct impact forces. There are a number of published papers on the problem that would merit to be mentioned here: please see (Faug et al., Phys. Rev. E 2009) for walls overtopped by a steady granular flows, see (Chanut et al., Phys. Rev. E 2010; Faug et al., Phys. Rev. E 2011) for walls overtopped by a transient granular flows, and more recently Albaba et al. (Phys. Rev. E 2018) for semi-infinite rigid walls (no overtopping). Moreover, it is also a well-established fact for snow avalanches/obstacle interaction problems that dead zones and shock-waves travelling upstream are important physical processes: see, and please cite, the EU Handbook 2009 (already mentioned above), and Faug et al. (Ann. Glaciol 2010).

Also some other papers on the topic by B. Sovilla and co-workers, as well as by Shiva Pudasaini and co-workers would merit much more attention.

page 2, line 3 again: note that "cohesive avalanches" is not a necessary condition. Dry (cohesionless) granular flows also produce dead zones at the impact with wide obstacles (see the literature mentioned above).

2 Figure 1: notation used here and all along the paper is weird... your drawing is nothing else than a traveling jump that is classically observed in water and granular flows (and snow avalanches) when those flows transition from a supercritical to a

subcritical flow regime (for instance when those flows impact a wall). The difference between water flows and granular (or snow) flows is the fact that the granular (and snow) jumps may be compressible and accompanied by a shock in density, in addition to both velocity and height discontinuities. In general, in fluid mechanics the notation used is  $h_1$  and  $h_2$  for the heights before and after the jump, respectively (the same for the velocities and densities). I'm left with the (bad) impression that using another notation may allow you to promote your approach but the approach is not so original at the end. Again, please see Gray et al. (J. Fluid Mechanics 2003), Hakonardottir and Hogg (Phys of Fluids 2005), Gauer and Johannesson (Handbook 2009, Chapter 11), Faug (Phys Rev E 2015) and Albaba et al. (Phys. Rev E 2018).

- page 2, lines 19-20: "Because we predict the speed of the compaction front, and therefore the loading duration as a function of the incoming avalanche velocity, the method facilitates the use of dynamic magnification factors in structural analysis." There already exist relevant models, based on the correct equations (the shock-wave equations: see another comment below, on your eq. (4) which looks to be wrong by the way), to predict the speed of the traveling shock-wave, as proposed earlier for snow avalanches (see Chapter 11 of the EU Handbook (2009)) or studied in detail for granular flows impacting walls by Faug (Phys. Rev. E 2015) and Albaba et al. (Phys. Rev. E 2018), or also proposed for landslides interacting with dams (Iversion J Geophys Res 2016).

- Eq. (3): this equation needs more explanation. Should reads:

$$dK_{dt} = d dt (M_V \_2) = M\_V\_V\_ + 12\_M\_V \_2\_ (1)$$

Could you explain why the first term is neglected? You are dealing with time-varying incoming flow conditions ( $\_V\_$  should vanish under steady-state conditions only).

-page 4, lines 5-6: "The difference between... is a measure of cohesion\... What do you mean? Without any cohesion (in a dry granular flow) you also have a difference (=a jump).

- Eq. (4) is wrong: this equation proposed by the authors does violate the mass conservation across the shock-wave. Let us use some more standard notation in fluid dynamics:  $U$  is the speed of the traveling wave, and  $f_1$  and  $f_2$  for any variable before the shock and after the shock, respectively, and  $[[f]] = f_2 - f_1$  the difference between the enclosed function  $f$  on the forward and rearward sides of the singular shock surface. The correct equation in its depth-averaged form is:  $[[h(u - U) - n]] = 0$  (2)

This yields ( $U < 0$ , and  $u_2 = 0$  in the dead zone against the wall):  $U = -u_1 X - 1$ ; (3) if we note  $X = \_2h_2\_1h_1$ . Your Eq. (4) gives  $U = -S\_ = -u_1 X$ , which does not give the correct jump condition.

- Eq. (6): why this  $1=2$  factor? This equation is false. Either it is a factor one and a difference in the brackets (sign  $-$ ) or a factor  $1=2$  and a sum (sign  $+$ ). - from now on, I'm a bit worried because Eq.(3), (4) and (5) are wrong or pulled out of a hat... Several equations in the rest of the paper should be corrupted by the mistakes made... and the plots (virtual cases shown and practical application) may be false too.

- (see previous comment) in particular, Eq. (10) clearly produces a drag coefficient which is wrong and does not satisfy the shock-wave conditions (see for instance

Albaba et al. Phys. Rev E 2018).

- Figure 2, caption: this is weird to state  $h_2 = h_1$  while you have a jump (you are talking about pile-up; see also a comment by Referee 1). Note that the density ratios used should merit some discussion. This is not an easy question in practice.

- Figure 3: are you sure that you get  $V_-$  (the incoming flow velocity upstream of the obstacle) at the two outgoing sections downstream of the obstacle? You should write mass conservation before inferring such a statement.

- page 8, line 9: why this (very personal) comment into brackets? Please remove it. I am sure there are scientists who are much more optimistic and will find a way of measuring this one day!

- page 8, lines 11-12: I agree that more data on snow avalanches and interaction with obstacles should be measured, about dead zone dynamics (compaction, length and shape evolution). BUT, please, refer/not ignore the information already available from the literature about granular flow/wall interaction: see for instance the recent paper by Albaba et al. (Phys. Rev. E 2018) where the shock-theory is compared to the dead zone dynamics measured in very informative numerical simulations on dry granular flows. In want of any precise measurements with snow, this information is rich.

- pages 13, lines 26-30, Eq. (17): I do not understand this statement at all. It should be removed. If I use your Eq. (16) and your Eq. (14) (recalling the latter is false) and neglect the "tractive" force term (as you do along your example), I exactly get that Eq. (17). Again, please check Albaba et al. (Phys Rev E 2018). The model proposed based on shock wave theory (mass and momentum conservation equations) gives also this form but the terms  $C_D$  and  $A$  are not constant and 4 (moreover) coupled: such a model is correct and powerful.

- conclusions: if the authors are able to correct the answer in their equations, they should explain why an energy approach is superior to already existing formula based on shock-wave theory relying on mass and momentum conservations.

### 3 Recommendation

For all the reasons given above, I conclude that the paper in its present form is far from being suitable for publication to NHESS. It seems to me that referees 1 and 2 both provided rather positive reports, however. Unlike both referees 1 and 2, I have no other choice but to provide a negative feedback on the current paper proposed by Perry Bartelt et al. That said, I would be happy to read in the future a revised paper if the authors can make an effort to : (i) correct the wrong equations, (ii) better explain their assumptions, and (iii) demonstrate that their energy approach is superior to existing methods (a cross-comparison would be needed and not only the plots from the energy approach by the authors) if points (i) and (ii) are carefully addressed first.

#### Anonymous Referee #4

Received and published: 31 October 2018

General comments I appreciate to read this paper that search to explain why large impact occurs even at low avalanche velocities.

However, as yet proposed by Peter Gauer and Thierry Faug, the theory proposed is very similar to what can be found in the Chapter 11 of "The design of avalanche protection dams", without a citation and without an explanation of the originality of this new

work. I think that at least the explanation given in the Bartelt's answer (26 September 2018) should be introduced in the paper.

→ We have now introduced an entire section that explains the difference between the "shockwave" and pile-up approaches. Please see introduction of the reply.

I would have expected a validation with more data collected in the field, or at least less simplification (in many cases the hypothesis  $h = h'$  is done, a rectangular dead zone is proposed: : :). → In the conclusions, we now highlight the problem with the experimental measurements.

In addition I would have appreciated a more detail where new equations are introduced.

Specific comments: → We have added more explanation to the equations. Including removing equations that are not necessary.

-Page 2 line 27: "kinetic energy" : do you mean "flux of kinetic energy"?

→ Yes,, we truly mean *the flux* of kinetic energy arriving at the obstacle. We now state it so.

-Page 2 line 27: The additional assumption that the width of the flow is larger than the obstacle width should be underlined.

→ Added the sentence: The width of the flow is assumed to be larger than the width of the obstacle.

-Page 2 line 30: why in Eq. (3)  $dK'/dt = 0.5 \cdot dM'/dt \cdot V'^2 + M' \cdot v' \cdot dv'/dt$  the term  $M' \cdot v' \cdot dv'/dt$  is omitted?

→ Yes. There is no change of mass  $M'$  during the compaction process. Added the sentence: All the incoming mass is piled-up. For example, we consider no "splashing" or mass deflection at the obstacle.

- Page 2 Figure 1. For a more understandable figure the z-axis could be added (In this way it is more clear where  $x=0$  is). In addition since Eq. (12) is based on the presence of a slope angle the x-axis could be inclined. Hence  $\dot{d}_!(t)$  could be represented in the figure.

→ Added z-axis in the figures. We state that the braking distance is in the direction of flow which could be inclined. We do not consider the change in potential energy (for now) and say so.

-Page 4 line 4: what do you mean with "stationary"? I think that it is not in the sense of  $dS/dt=0$ . → We mean that it has no velocity. To avoid confusions we delete. We call it the dead zone which means that it has no velocity.

-Page 4 line 5: "remains smaller": this is an assumption. Yes, we say we have no overtopping of the wall. We changed the formulation: "Because we do not have overtopping, we assume it remains smaller than the height of the obstacle..."

-Page 4 line 12: it is not clear to me from where this equation come from, in particular the value 1/2. In addition S is written without the dot (in discordance with Eq.(6)? We deleted the braking distance rate equation. The  $\frac{1}{2}$  comes from the location of the center-of-mass (which is  $\frac{1}{2}$  the length of  $Vdt$  and  $Sdotdt$ ). A dot over S was missing in Eq. 5.

-Page 4 line 17: it is not clear to me from where this equation come from. The rate of braking equation has been deleted. It is not necessary.

-Page 5 Figure 2: it is not clear to me in which way the Froude number (for me  $Fr = u/(gh)^{0.5}$ ) is related to the density. We assume that higher Froude numbers are associated with lower flow densities. Much of the existing literature presents results showing the pressure coefficient  $C_D$  increasing with decreasing Froude number. We attempt to explain why this is so.

- Page 5 line 11: Do you mean that the "friction component" is the total  $p$  or only  $\rho g z$  ? We mean the total  $p$  disappears. We write, "This friction component disappears on a flat slope  $g_x = 0$ ,  $p\Omega = 0$ . In this case only the traction friction on the side of the pile-up zone is acting.

-Page 6 Figure 3: the picture is not so clear. The x-axis drawn in vertical is difficult to interpreted: I suggest to turn the Side View picture. → Yes, we can rotate the side view picture. We will rotate when the editor tells us to proceed.



- Page 6: Eq. 13 should be better explained. → We have added some lines of explanation for the explanation of Eq. 13.

Assuming we have some velocity-squared drag (parameter  $\tau_T$ ), we can calculate the tractive force  $F_T$  on one shear plane,

$$F_T = \tau_T \rho_{\Phi} V_{\Phi}^2(t) \left[ S_{\Omega} h_{\Omega} \right].$$

The total tractive stress on the obstacle arises from two shear planes, we find,

$$p_T(t) = 2 \tau_T \rho_{\Phi} \frac{S_{\Omega}(t)}{w_{\Upsilon}} V_{\Phi}^2(t).$$

- Page 7 lines 25-26: “approximately twice” is in discordance with “between 3 and 5”

Yes, we deleted the line with “approximately twice. It is not necessary.

-Page 7 lines 27-32: what's the value?

We think the problem is with the word equivalent. The value of CD is between 3 and 5.

-Page 8 Figure 4, on the right: I don't understand why the value with  $<$  is plotted (For instance  $\rho=480 \text{ kg/m}^3$  and  $\rho=400 \text{ kg/m}^3$  . In this way we would have a decompression!)

Yes, this has to do with the fact that on the figure on the right we change the height of the pile-up from 2 m to 2.5 m, which leads to a “decompression”. In this region the results are not very realistic.

-Page 8 line 4: seen the Figure maybe it is better to use  $p_T(t) \ll p_{\Upsilon}(t)$

-Page 9 line 12: It is for this reasons that no data of are available? In part. This is the typical situation. Before we can arrive to perform some forensic science, much of the evidence has been destroyed.

-Page 9 lines 13: why the name “RAMMS” is not explicited?

Because we want to demonstrate that the procedure is independent of the numerical model. The model must provide the velocity and flow height with an idea what the incoming flow density is. We can introduce it, but for us it is not necessary and distracting.

-Page 10 Figure 6 on the right: what do you mean with “Total pressure?” please explicit (for instance  $p_{\Upsilon} + p_{\Omega}$  )

-Page 10 Figure 7: the shadow doesn't allow to well see the picture -Page 11 line 8: How much is high the bridge? This information can help the reader to understand better the problem. → We made the drone flights as fast as we could after the event. We don't have better pictures. Sorry.

-Page 11 lines 13 -14: “Calculated: : : 50 kPa)” is a repetition of “excess of the standard pressure formula (50 kPa)” at line 12

Yes, we deleted second line.

-Page 12 line 10: why do you continue to underline the specific case of  $h = h_{\Upsilon}$  ? Because this will always lead to the maximum pressures. Any increase in the pile-up height serves to reduce the pressure.

- Page 13 line 4: it is not clear to me in which way the Froude number (for me  $Fr = u / (gh)^{0.5}$  ) is related to the density. The higher the Froude number (velocity) the more disperse the flow and therefore the lower the flow density. This is a general relationship, that holds over a large density range.

-Page 13 lines 8-10: it would be nice to see what happen at the density simulated by RAMMS, if a wall is inserted directly as a DTM modification. The model is able to describe the snow compaction or numerical instabilities occurs? → RAMMS calculates the change in density (fluidization) due to surface friction. That is, where the frictional processes are located at the basal layer. It does not (yet) calculate the change in density due to a rigid impact with walls. This requires more work, especially describing the deformation field and the energy dissipation. We must remain with analytical solutions for now.

- Page 13 lines 25-26: Why do you say that it is not possible to experimentally measure the pile-up in a test site? I think that at least characteristics as the final S, the final density can be easily measured. → Yes, but we don't have this information for many of the existing

measurements. When we do, see for example the work of Thiebert, then we have wedge shaped pile-up distributions.

-Page 13 line 27:  $A(h, \_)$  is not explained. It is an empirical fit parameter, that has been suggested by several authors.

- It is not clear to me why you talk about pile-up but you suppose  $h = h'$ . In addition the results are compared with the standard equation  $p = v^2$  used in Switzerland where a  $h_{\text{stau}} = v^2 / (2g)$  is considered too. If this to heights corresponds at two different processes it could be explained. Any kind of increase in the pile-up height from the incoming mass will lower the pressures on the wall. We are always interested in the maximum pressures which occur for  $h_{\text{Phi}} = h_{\text{Omega}}$ . That is why we don't consider the  $h_{\text{stau}}$  for now.

- The reference "The design of avalanche protection dams" should be cited → CITED many times

Typing errors:

- Pag.1 line 21: "process: When" -> "process: when" → CHANGED

- Pag.2 line 7: "importance: The" -> "importance: the" → CHANGED

- -Page 8 Figure 4 caption: "givne"-> "given" → CHANGED

- Page 7 line 30: "coefficiens" -> "coefficients" → CHANGED

- Page 8 line 14: "model: To" -> "model: to" → CHANGED

- Page 9 caption Figure 5: " $V'(0) = 25 \text{ m/s}$ " -> " $V'(0) = 26 \text{ m/s}$ " → CHANGED

- Page 11 line 7: "caclulated" -> "calculated" → CHANGED

# Avalanche Impact Pressures on Structures with Upstream Pile-Up/Accumulation Zones of Compacted Snow

Perry BARTELT<sup>1</sup>, Andrin CAVIEZEL<sup>1</sup>, Sandro DEGONDA<sup>2</sup>, and Othmar BUSER<sup>1</sup>

<sup>1</sup>WSL Institute for Snow and Avalanche Research SLF, Flüelastrasse 11, 7260 Davos Dorf, Switzerland

<sup>2</sup>ETH Institute for Construction, 8903 Höggerberg, Zürich, Switzerland

*Correspondence to:* Perry Bartelt (bartelt@slf.ch)

**Abstract.** We apply the work-energy theorem to develop a method to predict avalanche impact pressures on rigid walls. The method treats snow at impact as an ideal plastic material and therefore accounts for the accumulation and pile-up of compacted snow in front of the wall. We show why the proposed method differs significantly from existing theories which treat the pile-up process using analogies to elastic "shockwave" propagation. We calculate under what conditions pile-up leads to large impact pressures at low avalanche approach velocities. The induced pressure depends on the incoming avalanche flow density relative to the ultimate compaction density because this determines the avalanche braking distance and therefore the flow deceleration in the upstream direction. The pile-up/accumulation process induces two additional pressures: (1) the static pressure of the pile-up zone and (2) the tractive stresses operating on the shear planes interfacing the accumulated and still moving avalanche snow. We demonstrate the use of the model on two theoretical examples and one real case study. Finally, we discuss the consequences of the application of the work-energy theorem for the interpretation of experimental measurements of avalanche impact.

## 1 Introduction

Recent works investigating avalanche-structure interaction have underscored the need to develop better methods to predict avalanche impact pressures (Ousset et al., 2015; De Biagi et al., 2015). There appears to be growing evidence that the long established engineering formula to calculate impact pressure  $p(t)$  (time  $t$ , avalanche flow density  $\rho_\Phi(t)$ , avalanche velocity  $V_\Phi(t)$  shape coefficient  $C_D$ ),

$$p(t) = \frac{1}{2} C_D \rho_\Phi V_\Phi^2(t), \quad (1)$$

is only valid for certain avalanche flow regimes (Sovilla et al., 2008; Baroudi et al., 2011). The formula under predicts measured values, particularly for slower moving avalanches in plug-flow or "gravitational" regimes (Sovilla et al., 2016). In practice the under prediction is usually compensated by applying shape coefficients  $C_D > 2$ .

Equation Eq. 1 is based on two important physical assumptions. The first assumption is that no avalanche mass accumulates behind the structure during the impacting process: when a moving avalanche hits the structure, the smashed snow fragments are assumed to be immediately removed from the impacted surface and re-entrained back into the flow (Bozhinskiy and Losev, 1998). Moreover, avalanching snow is treated as a fluid in which the flux of incoming snow is in balance with the rate of mass

removal at impact. When this condition is satisfied, the application of Eq. 1 is acceptable, i.e. for dry, cohesionless avalanches consisting of disperse agglomerations of snow particles. The formula is correctly applied to model powder avalanche interaction with thin structures, such as trees (Feistl et al., 2014; Bartelt et al., 2018a). It is clearly not valid for slow, dense, cohesive avalanches impacting objects where the interaction causes the avalanche to stop or pile-up in front of the structure. That is, when avalanching snow exhibits some solid behaviour. Many avalanche defense structures – such as dams and other flow obstacles – are purposely designed to induce this process to stop dense flowing avalanches (Barbolini et al., 2009).

The second assumption is of equal importance: the impacted structure is assumed to be perfectly rigid. The structure dissipates none of the incoming flux of kinetic energy in structural deformation energy, but dissipates it entirely at impact in the snow avalanche. This assumption quite often leads to an overestimation of the internal stress state of the structure, especially when the duration of the loadings  $p(t)$  is short. Far more serious is that the formula can lead to an underestimation of the structural deformations and therefore an under prediction of the true internal stress state of the structure when the time duration of  $p(t)$  is near the resonance frequency of the structure (Thibert et al., 2008; Baroudi and Thibert, 2009). The application of Eq. 1 must therefore be combined with dynamic magnification factors to account for the impulsive response of the structure when assessing the possibility of structural failure (Clough and Penzien, 1975). Structural analysis from avalanche impact therefore requires methods that quantify the duration of the impact loading.

The purpose of this paper is to develop a mechanical model to calculate avalanche impact pressures for cases when snow accumulates and piles-up at impact, forming a region of compacted avalanche snow in front of the obstacle. Unlike existing "shockwave"-type methods that treat this problem (Barbolini et al., 2009; Albaba et al., 2018), we apply the work-energy theorem to determine the deceleration of the avalanche snow arising from plastic deformation and compaction. The model therefore accounts for the solid-like behaviour of avalanching snow (Eglit et al., 2007; Faug et al., 2010). We calculate the dynamic impact pressure as a function of the avalanche flow density  $\rho_\Phi$  relative to the ultimate compacted solid density  $\rho_\Omega$ . Avalanche deceleration is calculated based on how kinetic energy is dissipated in the compaction zone. The results reveal why impact pressures in dense plug-flow regimes can be much higher than impact pressures in disperse flow regimes for equal approach velocity. Because we predict the speed of the compaction front, and therefore the loading duration as a function of the incoming avalanche velocity, the method facilitates the use of dynamic magnification factors in structural analysis. Perhaps more importantly, the method makes no analogy to elastic wave propagation and therefore predicts no reflection of mass at impact. This difference between the "shockwave" and work-energy approaches are highlighted in a separate section.

## 2 Pile-up/Accumulation Impact Pressure

We consider a dense avalanche  $\Phi$  with velocity  $V_\Phi$ , height  $h_\Phi$  and bulk density  $\rho_\Phi$  impacting a rigid structure (Figure 1). The structure of width  $w$  is positioned at the position  $x=0$ ; the positive  $x$ -direction defining the upstream direction of the pile-up. For simplicity we assume the avalanche strikes the structure with a mean depth-averaged velocity and density; that is, both variables are constant over the flow height defined in the  $z$ -direction, but can vary in the streamwise direction and therefore time. We do not consider the impact of the powder dust cloud II. For now we assume that the height of the structure  $h$  is higher

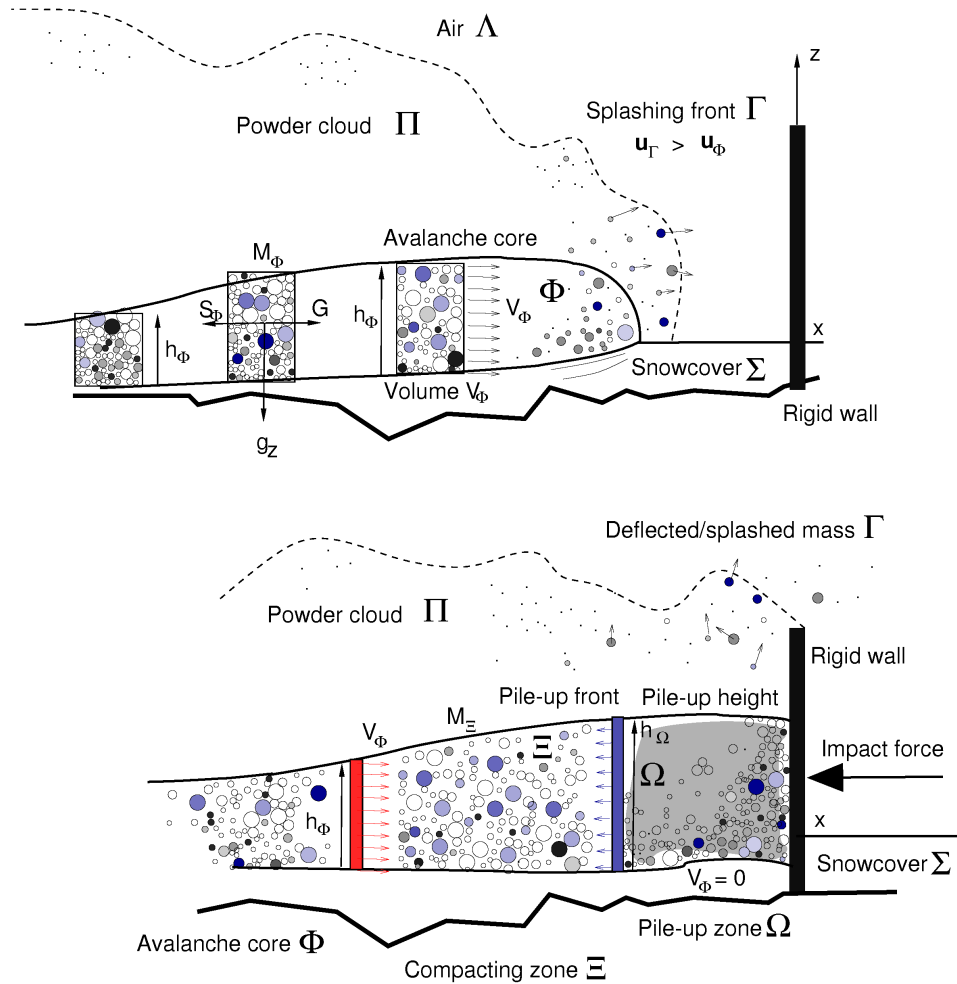

**Figure 1.** Avalanche impacts a rigid wall. The avalanche consists of a flowing core  $\Phi$  and powder cloud  $\Pi$ . The core is moving at the speed  $V_\Phi$ . The impact with the rigid wall creates a pile-up zone  $\Omega$  (no velocity). In the compaction zone  $\Xi$ , incoming avalanche mass is decelerated from  $V_\Phi$  to zero. The pile-up front represents the boundary between the moving and non-moving avalanche snow.

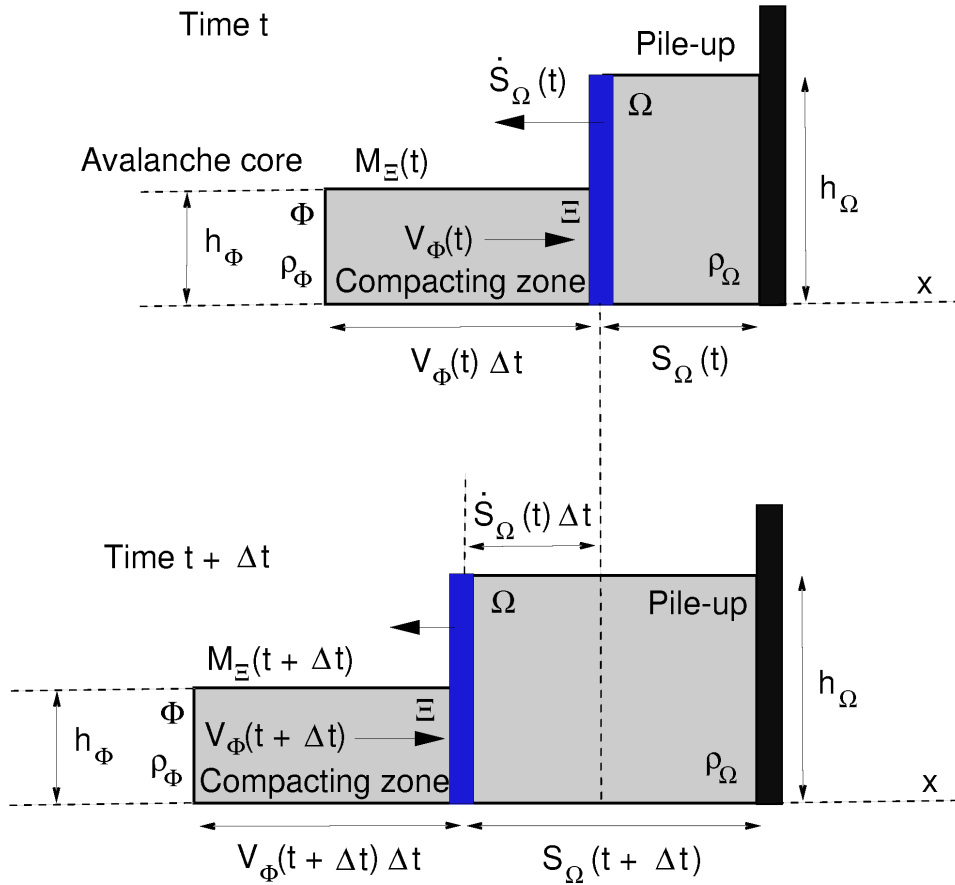

**Figure 2.** Mathematical model. Side view of avalanche impact with pile-up and accumulation. The upstream zone is divided into three regions: the dense flowing avalanche  $\Phi$ , the compacting region  $\Xi$  and the pile-up or accumulation zone  $\Omega$ . The avalanche arrives at time  $t$  travelling with the velocity  $V_\Phi$ , bulk density  $\rho_\Phi$  and flow height  $h_\Phi$ . Within the time interval  $\Delta t$  compaction zone  $\Xi$  develops in front of the structure with length  $V_\Phi \Delta t$ . A pile-up zone  $\Omega$  with length  $S_\Omega$  develops. The pile-up zone is increasing at the speed  $\dot{S}_\Omega$ . The braking distance of the mass in  $\Xi$  is  $d_{\Xi \rightarrow \Omega} = \frac{1}{2} [V_\Phi \Delta t - \dot{S}_\Omega \Delta t]$ .

than the flow  $h_\Phi$  i.e. there is no overtopping of the structure. The width of the flow is assumed to be larger than the width of the obstacle. A list of the notation is provided in Table 1.

We describe the pile-up process by considering avalanche mass immediately before and after the pile-up (Figure 1). All the incoming mass is piled-up. For example, we consider no "splashing" or mass deflection at the obstacle. The avalanche is divided into "compacting" avalanche snow (region  $\Xi$ , density not yet  $\rho_\Omega$ , velocity not yet zero, time  $t$ ) and "compacted" avalanche snow (region  $\Omega$ , density  $\rho_\Omega$ , no velocity, time  $t + \Delta t$ ). Measurements of compacted snow density are rare. Thibert et al. (2008) measured a pile-up density  $\rho_\Omega$  of  $540 \text{ kg m}^{-3}$  in front of the instrumented pylon at the French Col du Lautaret test site.

The avalanche mass arriving at the obstacle  $M_\Xi$  and stopping within the time interval  $\Delta t$  is

$$M_\Xi = \rho_\Phi h_\Phi w [V_\Phi \Delta t]. \quad (2)$$

The corresponding change of kinetic energy  $\Delta K_\Xi$  of the avalanche is therefore

$$\Delta K_\Xi = \frac{1}{2} M_\Xi(t) V_\Phi^2 = \frac{1}{2} \rho_\Phi h_\Phi w [V_\Phi^3 \Delta t]. \quad (3)$$

The length of the compacted, pile-up zone is denoted  $S_\Omega$ , the height  $h_\Omega$ . The pile-up height might be larger than or equal to the incoming avalanche height  $h_\Omega \geq h_\Phi$ . Because we do not have overtopping, we assume it remains smaller than the height of the obstacle  $h_\Omega < h$ . The difference between  $h_\Phi$  and  $h_\Omega$  is a measure of the cohesion. Cohesive flows with strong bonding between the snow clumps reduce the ability of the avalanche at impact to increase the pile-up height,  $h_\Phi \approx h_\Omega$  (Bartelt et al., 2012, 2015). Because of the incoming avalanche, the length of the pile-up zone is growing at the rate  $\dot{S}_\Omega$ ; it is given by conservation of mass,

$$\dot{S}_\Omega = \frac{\rho_\Phi(t) h_\Phi(t)}{\rho_\Omega h_\Omega} V_\Phi(t). \quad (4)$$

During the pile-up, the region  $\Xi$  of length  $V_\Phi(t) \Delta t$  in the  $x$ -direction compacts, increasing the length of the compaction zone  $\Omega$ , see Fig. 4. The difference in the locations of the center-of-mass of the compacting zone  $\Xi$  and the piled-up mass  $\Omega$  defines the braking distance  $d_{\Xi \rightarrow \Omega}$  over which the incoming mass must stop,

$$d_{\Xi \rightarrow \Omega} = \frac{1}{2} [V_\Phi \Delta t - \dot{S}_\Omega \Delta t]. \quad (5)$$

The mean force on the obstacle  $\bar{F}_\Xi$  is found by equating the work-done by the braking and the change of kinetic avalanche energy in the compaction zone  $\Delta K_\Xi$ ,

$$\bar{F}_\Xi d_{\Xi \rightarrow \Omega} = [p_\Xi h_\Omega w] d_{\Xi \rightarrow \Omega} = \Delta K_\Xi. \quad (6)$$

The impact pressure  $p_\Xi$  is found assuming the force is applied uniformly over the impact area  $h_\Omega w$ . Therefore,

$$p_\Xi = \frac{h_\Phi V_\Phi}{h_\Omega [V_\Phi - \dot{S}_\Omega]} \rho_\Phi V_\Phi^2 \quad (7)$$

and with the substitution of the equation for mass conservation

$$p_{\Xi} = \frac{h_{\Phi}}{h_{\Omega}} \left[ 1 - \frac{\rho_{\Phi} h_{\Phi}}{\rho_{\Omega} h_{\Omega}} \right]^{-1} \rho_{\Phi} V_{\Phi}^2. \quad (8)$$

From which it is possible to define an equivalent pressure factor  $C_D$  for the pile-up/accumulation regime,

$$C_D = 2 \frac{h_{\Phi}}{h_{\Omega}} \left[ 1 - \frac{\rho_{\Phi} h_{\Phi}}{\rho_{\Omega} h_{\Omega}} \right]^{-1}. \quad (9)$$

- 5 Note that the dynamic pressure factor becomes infinite when  $\rho_{\Phi} h_{\Phi} = \rho_{\Omega} h_{\Omega}$ . These values of equivalent  $C_D$  are in agreement with measured values for all  $\rho_{\Omega} > \rho_{\Phi}$ , see Fig. 3, and compare to Sovilla et al. (2008, 2016). This result suggests that impact pressures of slow moving avalanches can be large if the density of the incoming avalanche is near the compaction density. It is also possible to physically interpret the pressure factor  $C_D$ . Substitution of Eq. 1 into the work-energy theorem (Eq. 6) leads to

$$10 \quad C_D = \frac{V_{\Phi} \Delta t}{d_{\Xi \rightarrow \Omega}}. \quad (10)$$

The pressure factor is therefore the length of the compaction zone  $\Xi$  relative to the braking distance  $d_{\Xi \rightarrow \Omega}$ .

### 3 Comparison of the work-energy approach to "shockwave" models

- Other models of avalanche pile-up have been advanced to determine the impact forces on walls. The most notable of these are the so-called "shockwave" models which are discussed in the avalanche mitigation handbook (see Barbolini et al. (2009),  
 15 chapter 11), or in recent papers (Faug, 2015; Albaba et al., 2018). These analytical approaches are derived from an analogy with the theory of elastic wave propagation; that is, the "pile-up" wave is considered as a "shockwave" that travels upstream when the avalanche impacts a structure. On one side of the "shockwave" mass is piled-up (velocity zero) while on the other side, incoming avalanche snow arrives (velocity =  $V_{\Phi}$ ). The incoming avalanche snow impacts the piled-up, stationary mass which transfers the impact force to the rigid wall.

- 20 There are important differences between the two model approaches that deserve attention. In the pile-up model presented here, avalanche snow is considered a completely plastic material. There is no elastic deformation that is transferred over the flow discontinuity (the pile-up front). The incoming kinetic energy of the avalanche is consumed completely during the pile-up process.

- Application of the work energy theorem provides the mean deceleration  $a_{\Xi \rightarrow \Omega}$  of the incoming mass during the pile-up  
 25 process,

$$a_{\Xi \rightarrow \Omega} = \frac{1}{2} \frac{V_{\Phi}^2}{d_{\Xi \rightarrow \Omega}}. \quad (11)$$

Since we assume the deceleration  $a_{\Xi \rightarrow \Omega}$  is constant over the time interval  $\Delta t = t_1 - t_0$ , the velocity of the incoming mass decreases linearly from  $V_{\Phi}$  to zero over the braking distance  $d_{\Xi \rightarrow \Omega}$ . The braking distance determines the change in momentum



**Table 1.** Notation table. Dimension and definition. See Fig. 1.

| Symbol                                      | Unit                 | Defintion                                                               |
|---------------------------------------------|----------------------|-------------------------------------------------------------------------|
| $\Phi$                                      | Subscript            | Avalanche core                                                          |
| $\Pi$                                       | Subscript            | Powder cloud                                                            |
| $\Lambda$                                   | Subscript            | Air                                                                     |
| $\Gamma$                                    | Subscript            | Splashing, avalanche pre-front                                          |
| $\Omega$                                    | Subscript            | Pile-up zone                                                            |
| $\Xi$                                       | Subscript            | Compacting zone                                                         |
| Coordinate system, time, obstacle           |                      |                                                                         |
| $x, y, z$                                   | m                    | Coordinate system, $x=0$ location of obstacle                           |
| $t, \Delta t$                               | s                    | Time, time increment                                                    |
| $w$                                         | m                    | Width of obstacle                                                       |
| $h$                                         | m                    | Height of obstacle, $z$ -direction                                      |
| Avalanche core $\Phi$                       |                      |                                                                         |
| $V_{\Phi}$                                  | $\text{m s}^{-1}$    | Flow velocity in the $x$ -direction<br>(Positive towards the wall)      |
| $\rho_{\Phi}$                               | $\text{kg m}^{-3}$   | Bulk density of core $\Phi$                                             |
| $h_{\Phi}$                                  | m                    | Flow height of avalanche core $\Phi$                                    |
| Compacting $\Xi$ and pile-up $\Omega$ zones |                      |                                                                         |
| $M_{\Xi}$                                   | $\text{kg m}^{-2}$   | Mass in the compacting zone $\Xi$                                       |
| $\Delta K_{\Xi}$                            | J                    | Change of kinetic energy in the compacting zone                         |
| $\Delta P_{\Xi}$                            | $\text{kg m s}^{-1}$ | Change of momentum in the compacting zone                               |
| $d_{\Xi \rightarrow \Omega}$                | m                    | Braking distance                                                        |
| $a_{\Xi \rightarrow \Omega}$                | $\text{m s}^{-2}$    | Deceleration of mass in the compacting zone                             |
| $S_{\Omega}$                                | m                    | Length of pile-up zone in front of wall                                 |
| $\dot{S}_{\Omega}$                          | $\text{m s}^{-1}$    | Speed of pile-up front<br>(Positive away from wall)                     |
| $\rho_{\Omega}$                             | $\text{kg m}^{-3}$   | Density of pile-up zone $\Omega$                                        |
| $h_{\Omega}$                                | m                    | Pile-up height                                                          |
| $X$                                         |                      | Compaction factor $X = \rho_{\Omega} h_{\Omega} / \rho_{\Phi} h_{\Phi}$ |
| Forces and pressures                        |                      |                                                                         |
| $G, g_x, g_z$                               | $\text{m s}^{-2}$    | Gravity, gravitational components                                       |
| $F_{\Xi}, \bar{F}_{\Xi}$                    | N                    | Dynamic impact force and mean impact force from compaction and pile-up  |
| $\bar{F}_T$                                 | N                    | Mean shear force on boundary                                            |
| $p_{\Xi}$                                   | Pa                   | Dynamic impact pressure from pile-up                                    |
| $p_{\Omega}$                                | Pa                   | Static pile-up pressure                                                 |
| $p_T$                                       | Pa                   | Shear traction on pile-up boundary                                      |
| $\mu_{\Omega}$                              |                      | Coulomb friction coefficient in pile-up zone                            |
| $\tau_T$                                    |                      | Sliding friction coefficient, shear traction pile-up zone               |

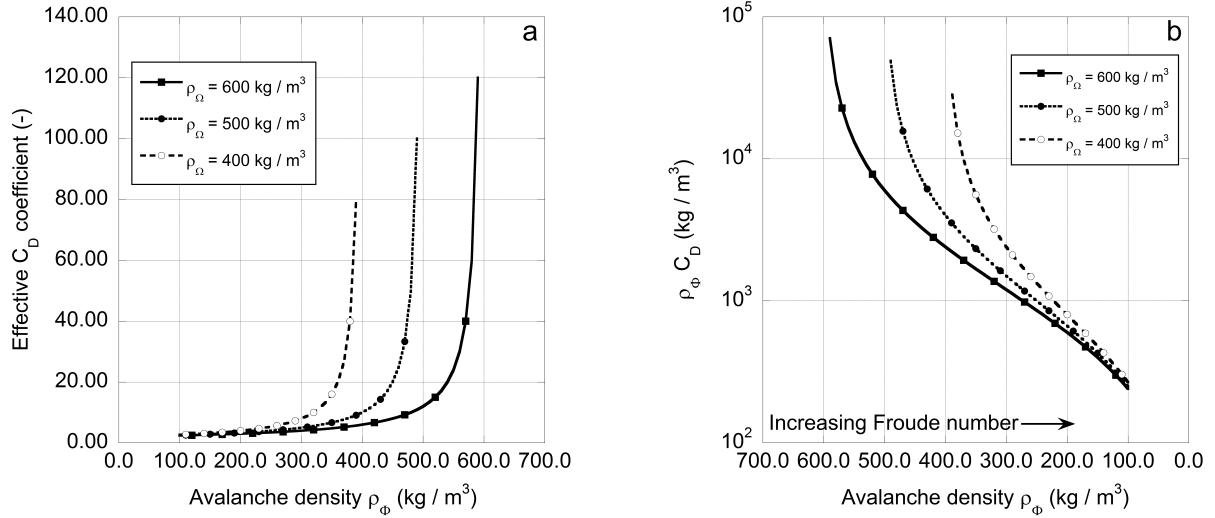

**Figure 3.** a) Effective  $C_D$  coefficient (Eq. 9) for different incoming avalanche densities  $\rho_\Phi$  and three compaction densities  $\rho_\Omega$ . The flow height and pile-up heights are equal  $h_\Phi = h_\Omega$ . Large effective  $C_D$  coefficients result when  $\rho_\Phi \approx \rho_\Omega$ . In this case compacting (braking) distances are short and impact pressures are large. b) The calculated  $\rho_\Phi C_D$  are in agreement with values derived from full scale measurements, e.g. (Sovilla et al., 2008). For the sake of comparison to measured values we plot the calculated  $\rho_\Phi C_D$  values with decreasing density to mimic increasing Froude numbers (higher Froude numbers correspond to lower flow densities). This produces the effect that effective pressure factors  $C_D$  are higher for lower flow velocities.

of the avalanche  $\Delta P_\Xi$  and therefore the mean, time averaged force on the wall  $\bar{F}_\Xi$ ,

$$\Delta P_\Xi = \int_{t_0}^{t_1} F_\Xi dt = \bar{F}_\Xi \Delta t = M_\Xi a_{\Xi \rightarrow \Omega} \Delta t. \quad (12)$$

The change in momentum is taken-up entirely by the obstacle. The idea of a braking distance is fundamental to the concept of pile-up. Note that a braking distance  $d_{\Xi \rightarrow \Omega} = 0$  implies an infinite deceleration and therefore an infinite force. However, in the pile-up model the energy is finite. It is not possible to transfer infinite energy to the structure. Within the framework of the pile-up model a braking distance  $d_{\Xi \rightarrow \Omega} = 0$  indicates that all incoming avalanche mass is stopped instantaneously at the wall. There is no compaction. A negative braking distance  $d_{\Xi \rightarrow \Omega} < 0$  is non-physical. It implies that the incoming avalanche snow has been somehow reflected backwards.

The concept of a braking distance over which a mass decelerates is not included in the "shockwave" model. The "shockwave" model calculates the change in momentum to be, see (Barbolini et al., 2009; Albaba et al., 2018):

$$\Delta P_\Xi = M_\Xi V_\Phi + M_\Xi \dot{S}_\Omega = (\rho_\Phi h_\Phi V_\Phi \Delta t) V_\Phi + (\rho_\Phi h_\Phi V_\Phi \Delta t) \dot{S}_\Omega. \quad (13)$$

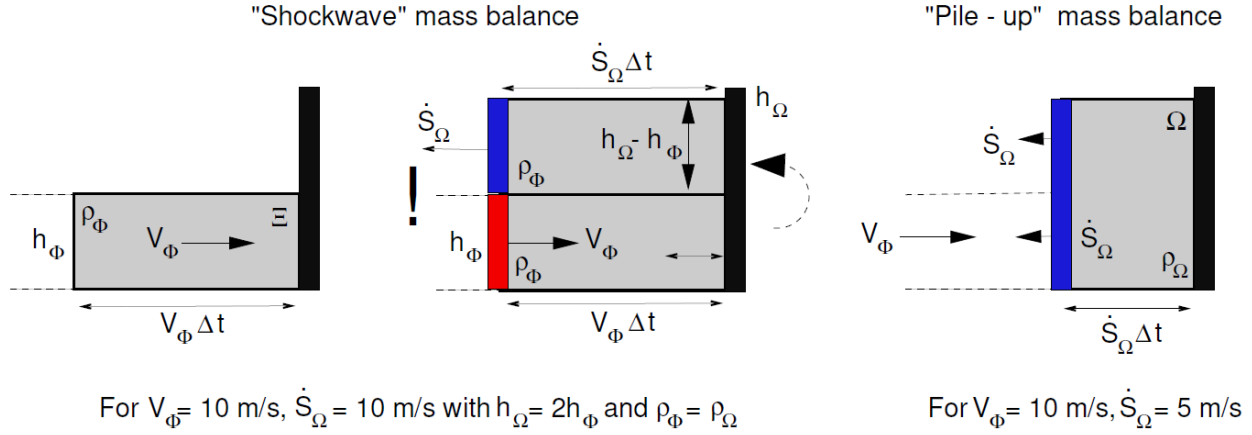

**Figure 4.** Difference between the "shockwave" and pile-up models for the case  $X = 2$ . In the "shockwave" approach the momentum balance is similar to a mass of  $M_\Xi = \rho_\Phi h_\Phi V_\Phi \Delta t$  that impacts the wall and is reflected back such that  $V_\Phi = \dot{S}_\Omega$  ( $r = 1$ ). The braking distance  $d_{\Xi \rightarrow \Omega} = 0$ . Thus, in the "shockwave" model there is no stationary, piled-up mass in front of the wall.

From which the mean force on the wall  $\bar{F}_\Xi$  is found to be,

$$\Delta P_\Xi = \bar{F}_\Xi \Delta t. \quad (14)$$

Although the end result agrees with the pile-up approach, it is highly problematic. The momentum balance of the shockwave model indicates that mass exists, travelling with the speed  $\dot{S}_\Omega$ , moving away from the wall. Note that because  $V_\Phi$  and  $\dot{S}_\Omega$  have opposite directions, the change in momentum  $\Delta P_\Xi$  is the sum of the momentum associated with each velocity. The equation for the change in momentum is therefore equivalent to a ball of mass  $M_\Xi$  impacting the wall with the speed  $V_\Phi$  that is reflected backwards with the speed  $\dot{S}_\Omega$ . The velocity  $\dot{S}_\Omega$  is no longer the speed of a massless pile-up front, but it now represents the speed that mass is reflected backwards relative to the wall. In this sense, the "shockwave" model, does not model pile-up, rather a stream of incoming mass that is reflected backwards at the speed  $\dot{S}_\Omega$  (see Figures 4 and 5). In the "shockwave" model the ratio  $r = \dot{S}_\Omega / V_\Phi$  can be considered a collisional restitution coefficient. In fact, when  $r = 1$ , there is no energy loss.

In the "shockwave" model the speed of the pile-up wave is given from mass conservation by

$$\dot{S}_\Omega = \frac{V_\Phi}{\frac{\rho_\Omega h_\Omega}{\rho_\Phi h_\Phi} - 1} = \frac{V_\Phi}{X - 1} \quad (15)$$

where  $X$  is the so-called compaction factor, see (Albaba et al., 2018). A numerical example shows that when  $X = 2$ ,  $\dot{S}_\Omega = V_\Phi$  and  $r = 1$  and therefore we have no energy loss. This can be seen in Figure 4, where we have  $\rho_\Phi = \rho_\Omega$  and  $h_\Omega = 2h_\Phi$ . In this case the incoming mass cannot fill the pile-up volume (because the densities are equal) and appears to jump up to the free space (above  $h_\Phi$ ) and is, at the same time reflected by the wall. Because the flow of incoming mass is continuous, it appears as if the stream of incoming mass is reflected backwards. The mass is reflected backwards on top of the incoming stream. In the pile up model, the incoming mass is stopped and distributed over the height  $h_\Omega$  (compare in Fig. 4). We have, for the pile-up

model,

$$\dot{S}_\Omega = \frac{V_\Phi}{X}. \quad (16)$$

In the work-energy approach presented here, there is no reflection of mass. All incoming energy is dissipated. A slight deflection is possible to raise the height of the pile-up from  $h_\Phi$  to  $h_\Omega$ .

- 5 Both the pile-up and "shockwave" models assume the density of the incoming mass ( $\rho_\Phi$ ) is increased to the pile-up density ( $\rho_\Omega$ ). However, in the "shockwave" model only a part of the mass is truly compacted. The other part of the incoming mass is used to "fill-in" the void space of its own volume to create the density  $\rho_\Omega$ . The "shockwave" mass balance therefore leads to a higher "shock" velocity than the pile-up speed. Mathematically,

$$\underbrace{\rho_\Phi h_\Phi V_\Phi}_{\text{Incoming mass}} = \underbrace{\rho_\Omega h_\Omega \dot{S}_\Omega}_{\text{Compacted mass}} - \underbrace{\rho_\Phi h_\Phi \dot{S}_\Omega}_{\text{Fill-in mass}}. \quad (17)$$

- 10 In order to "fill-in" its own volume ( $\rho_\Phi h_\Phi \dot{S}_\Omega$ ), the mass in the volume must be stopped such that the flowing mass from behind can fill in the void space. This process ends when the density of the volume ( $h_\Phi \dot{S}_\Omega$ ) reaches compaction density  $\rho_\Omega$ . In the pile-up model, the velocity gradient is concentrated at the moving front between the piled-up mass and the incoming mass (see Figs 4 and 5). There is no fill-in, only compaction of the incoming mass. All the incoming mass is moving with the speed of the avalanche and is completely compacted by changing the volume from  $\rho_\Phi h_\Phi$  to  $\rho_\Omega h_\Omega$ . During this time, the incoming  
15 mass experiences a constant, mean deceleration  $a_{\Xi \rightarrow \Omega}$ .

To understand the difference in the calculated pile-up speeds between the two models we must be aware that the definition of the braking distance  $d_{\Xi \rightarrow \Omega}$  is independent of the model approach,

$$d_{\Xi \rightarrow \Omega} = \frac{1}{2} [V_\Phi - \dot{S}_\Omega] \Delta t. \quad (18)$$

- It is the distance between the center-of-mass of the compaction volume ( $1/2 V_\Phi \Delta t$ ) and the location of the piled-up snow ( $1/2$   
20  $\dot{S}_\Phi \Delta t$ ). For the pile-up model  $\dot{S}_\Omega = V_\Phi/X$  and for the shockwave model  $\dot{S}_\Omega = V_\Phi/(X-1)$  (both from mass conservation). Therefore, the braking distance for the shockwave model is

$$d_{\Xi \rightarrow \Omega} = \frac{1}{2} \left[ \frac{X-2}{X-1} \right] V_\Phi \Delta t, \quad (19)$$

while for the pile-up model, it is as before

$$d_{\Xi \rightarrow \Omega} = \frac{1}{2} \left[ 1 - \frac{1}{X} \right] V_\Phi \Delta t. \quad (20)$$

- 25 In principle, for a given pile-up speed, the braking distances should be the same for both models. For clarity we tabulate the different braking distances as a function of the magnification factors  $X = 1$  to 5 (Table 2). Cases  $X < 1$  are non-physical (no compaction to a smaller density than  $\rho_\Phi$ ) and cases  $X > 5$  are non-realistic ( $h_\Omega > 5 h_\Phi$ ,  $\rho_\Phi = \rho_\Omega$ ). We note that each model predicts the same impact force for each  $X$ , but the braking distances differ significantly. Surprisingly the "shockwave" model produces *negative* braking distances for  $X < 2$ . That is, the pile-up center of mass has now moved back, past the starting

**Table 2.** Calculated braking distance using "shockwave" and pile-up models. The calculated values for the pile-up model are all  $d_{\Xi \rightarrow \Omega} \geq 0$ . The mass balance of the shockwave model produces elastic reflections ( $d_{\Xi \rightarrow \Omega} = 0$ ) for the case  $X = 2$ .

| $X$ | "Shockwave"<br>$d_{\Xi \rightarrow \Omega}$<br>(x $V_{\Phi} \Delta t$ ) | Pile-up<br>$d_{\Xi \rightarrow \Omega}$<br>(x $V_{\Phi} \Delta t$ ) | Comments                                                                                                                        |
|-----|-------------------------------------------------------------------------|---------------------------------------------------------------------|---------------------------------------------------------------------------------------------------------------------------------|
| 1   | $-\infty$                                                               | 0                                                                   | "Shockwave" model: infinite braking distance<br>Pile-up model: infinite force                                                   |
| 1.5 | -1                                                                      | 1/6                                                                 | "Shockwave" model: negative braking distance<br>Pile-up model: positive braking distance (see Figure 5)                         |
| 2   | 0                                                                       | 1/4                                                                 | "Shockwave" model: zero braking distance, finite force<br>Pile-up model: positive braking distance, finite force (see Figure 4) |
| 3   | 1/4                                                                     | 1/3                                                                 | "Shockwave" model: not all energy dissipated                                                                                    |
| 4   | 1/3                                                                     | 3/8                                                                 | "Shockwave" model: not all energy dissipated                                                                                    |
| 5   | 3/8                                                                     | 2/5                                                                 | "Shockwave" model: not all energy dissipated                                                                                    |

location of the center-of-mass of the incoming volume. For the case  $X = 2$ , the entire incoming kinetic energy has been reflected backwards,  $r = 1$ , see Figure 4; for the  $X = 1.5$  it appears that energy has been inputted into the pile-up to drive the reflected mass backwards at a speed twice the incoming speed,  $r = 2$ , see Figure 5. This simply cannot occur during a "pile-up" when all the mass in front of the wall is stationary. Again, it appears that in the "shockwave" model mass is not piled-up, but reflected backwards, sometimes even without the loss of energy.

In summary the application of the work energy theorem satisfies the balance of momentum as well as the conservation of energy. The mass in the pile-up zone has no velocity after the pile-up. The "shockwave" model suggests that there is some mass with kinetic energy (and therefore momentum) at the end of the pile-up process. Evidently, in the shockwave approach, there exist situations in which no energy is dissipated at all. These situations do not exist in the pile-up model, in which all kinetic energy is dissipated by irreversible compaction.

#### 4 Mass Accumulation Induces Tractive and Static Pressures on the Obstacle

The total pressure acting on the structure consists of an additional two parts: (1) the static pressure  $p_{\Omega}(t)$  and (2) tractive pressures that develop on the shear planes between the moving and piled-up snow  $p_T(t)$ , see Fig. 6 and (Faug et al., 2010)

$$p = p_{\Xi} + p_{\Omega} + p_T. \quad (21)$$

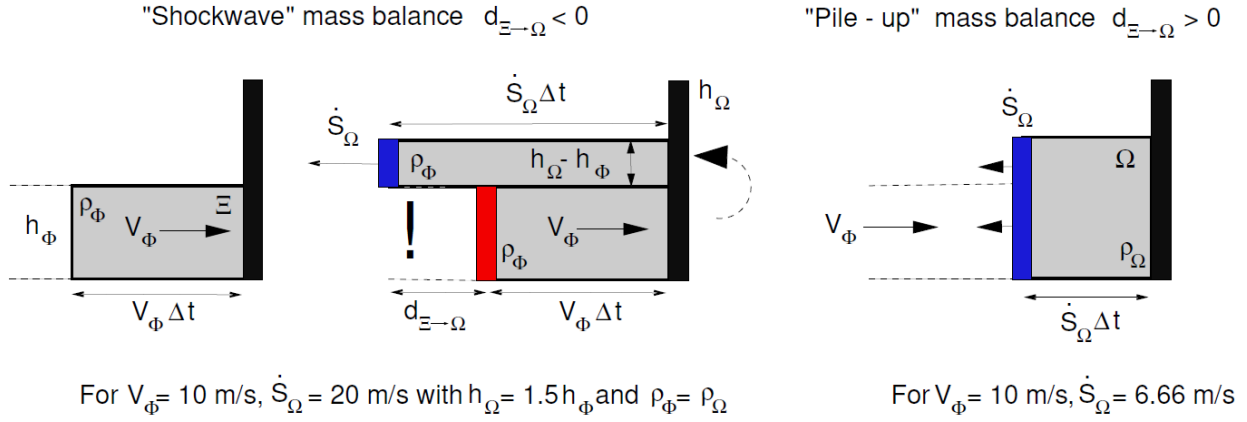

**Figure 5.** Difference between the "shockwave" and pile-up models for the case  $X=1.5$ . The shockwave model predicts a negative and non-physical braking distance  $\Delta d_{\Xi \rightarrow \Omega} = -1$ . The incoming mass is reflected back such that  $V_{\Phi} = 2 \dot{S}_{\Omega}$  ( $r > 1$ ). Therefore, in the "shockwave" model there is no stationary, piled-up mass in front of the wall. This is not the case in the pile-up model.

All three pressures vary as a function of the accumulation zone  $S_{\Omega}$  and the speed it is growing  $\dot{S}_{\Omega}$ . The static pressure of the pile-up zone  $\Omega$  is given by

$$p_{\Omega} = \rho_{\Omega} S_{\Omega} [g_x - \mu_{\Omega} g_z] \quad \text{for} \quad g_x > \mu_{\Omega} g_z \quad (22)$$

where  $g_x$  and  $g_z$  represent the gravitational accelerations in the  $x$  and slope perpendicular directions  $z$ , respectively. The Coulomb parameter  $\mu_{\Omega}$  characterizes the basal friction upstream of the structure. The impact pressure in the pile-up/accumulation regime, unlike the dynamic pressure computed with the standard formula, will depend on the slope angle, as well as the terrain features surrounding the structure. This friction component disappears on a flat slope,  $g_x=0$ ,  $p_{\Omega} = 0$ .

On the boundary between the moving and non-moving snow tractive stresses develop. These can only be described by assuming some constitutive relationship between the moving planes, as well as some deformation geometry of the dead zone.

- 10 For the ideal case of a rectangular dead zone (constant width  $w$ ), the shear tractions are perpendicular to the structure, requiring no rotation of the shear components into the coordinate system of the obstacle. The side area over which the tractive stress operates is  $S_{\Omega} h_{\Omega}$ . Assuming we have some velocity-squared drag (parameter  $\tau_T$ ), we can calculate the mean tractive force  $\bar{F}_T$  on one shear plane,

$$\bar{F}_T = \tau_T \rho_{\Phi} V_{\Phi}^2 [S_{\Omega} h_{\Omega}]. \quad (23)$$

- 15 The total tractive stress on the obstacle arises from two shear planes, we find,

$$p_T = 2\tau_T \rho_{\Phi} \frac{S_{\Omega}}{w} V_{\Phi}^2. \quad (24)$$

The dimensionless shearing plane resistance  $\tau_T$  can be well approximated by the Voellmy formula  $\tau_T \approx g/\xi$ , where here  $\xi$  is the Voellmy velocity squared drag coefficient.

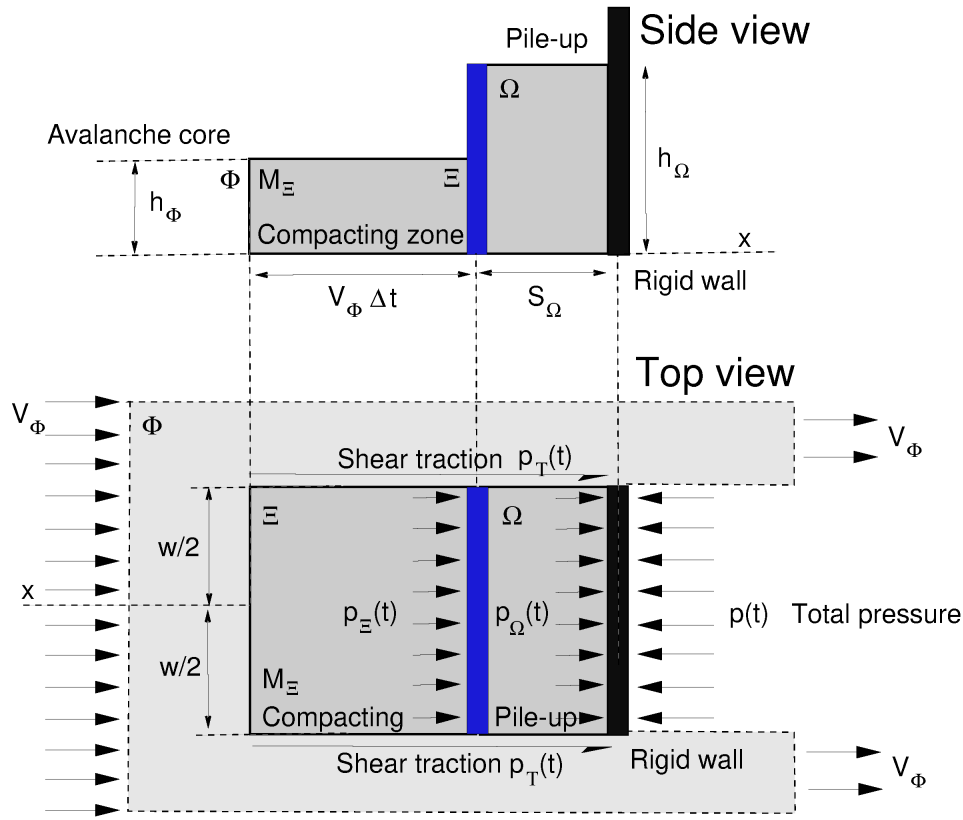

**Figure 6.** Side and top views of avalanche impact with pile-up/accumulation. The upstream zone is divided into three regions: the dense flowing avalanche  $\Phi$ , the compaction zone  $\Xi$  and the pile-up or accumulation zone  $\Omega$ . The total pressure (reaction) acting on the rigid structure is the sum of the pressures  $p(t) = p_{\Omega}(t) + p_T(t) + p_{\Xi}(t)$ .

## 5 Applications

### 5.1 Constant Velocity: $V_{\Phi}(t) = 10$ m/s

As a first example we calculated a 15 s long impact with a constant incoming avalanche velocity  $V_{\Phi}(t) = 10$  m/s. This velocity is often used to separate the red and blue danger zones in hazard mapping applications in Switzerland. The calculated pressure with standard equation Eq. 1 predicts a pressure value of  $p(t) = 30$  kPa for flow density  $\rho_{\Phi} = 300$  kg/m<sup>3</sup> and  $C_D = 2$ . We do not consider static  $p_{\Omega}(t)=0$  or tractive  $p_T(t)=0$  contributions to the pile-up pressure.

In the first series of calculations we set  $h_{\Phi} = h_{\Omega}$  and determined the impact pressure as a function of the avalanche flow density  $\rho_{\Phi}$  but with different compaction densities  $\rho_{\Omega}$  (400 kg/m<sup>3</sup>, 500 kg/m<sup>3</sup> and 600 kg/m<sup>3</sup>), see Fig. 7a. Large impact pressures are associated with higher densities relative to the compaction density. The larger the compaction density, the slower the rise in calculated pressure. Moreover, the compaction density plays an important role in determining the magnitude of the impact pressure.

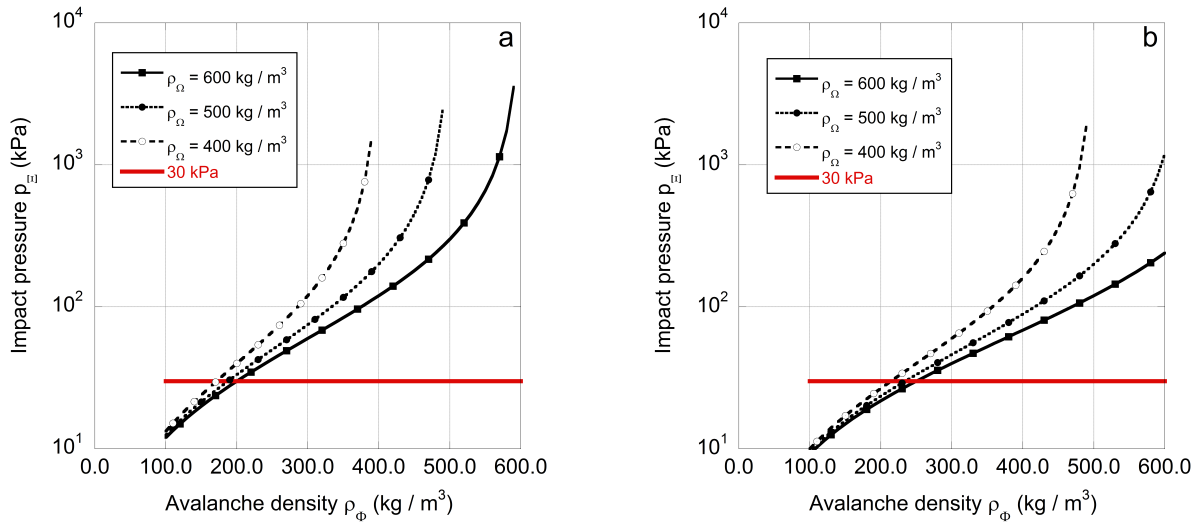

**Figure 7.** Calculated impact pressure for constant avalanche flow velocity  $V_{\Phi} = 10$  m/s, different flow densities  $\rho_{\Phi}$  and three compacted densities  $\rho_{\Omega}$ . The standard equation calculates an impact pressure of  $p(t) = 30$  kPa (red line) a)  $h_{\Phi} = h_{\Omega}$ , b)  $h_{\Phi} = 2.0$  m and  $h_{\Omega} = 2.5$  m. For flow densities near the compaction density, the pressures are higher than given by Eq. 1.

In a second series of calculations we allowed some increase in the pile-up height. That is, we modelled a less cohesive flow. For comparison we set  $h_{\Phi} = 2.0$  m and  $h_{\Omega} = 2.5$  m, see Fig. 7b. Here too, pressures greater than 30 kPa can be found for higher flow densities. Pressures greater than 100 kPa require both high flow density  $\rho_{\Phi}$ , but also low compaction densities  $\rho_{\Omega}$ . Impact pressures over 100 kPa can be expected for  $V_{\Phi}(t) = 10$  m/s for flow densities  $\rho_{\Phi} \approx 400$  kg/m<sup>3</sup>.

## 5.2 Variable Velocity $V_{\Phi}(t)$ and tractive stresses $p_T(t)$

To demonstrate how the model calculates impact pressure when the avalanche flow velocity and density vary over time we consider two examples.

In the first example an avalanche impacts a structure with an approach velocity of  $V_{\Phi}(0) = 26$  m/s; the velocity decreases in time to approximately  $V_{\Phi}(t > 9s) = 10$  m/s (Fig. 8a). The high velocity region lasts only several seconds. We assume a relatively low front density  $\rho_{\Phi} = 220$  kg/m<sup>3</sup>. The flow density increases towards the avalanche tail. The flow height of the incoming avalanche is constant  $h_{\Phi} = 3$  m; the pile-up height is equal  $h_{\Omega} = 3$  m. We assume a pile-up density of  $\rho_{\Omega} = 500$  kg/m<sup>3</sup>. Figure 8b compares the calculated pressures  $p_{\Xi}(t)$  and  $p_{\Xi}(t) + p_T(t)$  with the pressure of the standard engineering formula Eq. 1 (red line,  $C_D = 2$ ). We take  $\tau_T \approx g/\xi$ , with  $\xi = 2000$  m/s<sup>2</sup> and assume no static pressure  $p_{\Omega}(t) = 0$ . The calculated  $C_D$  values are between 3 and 5 for this example.



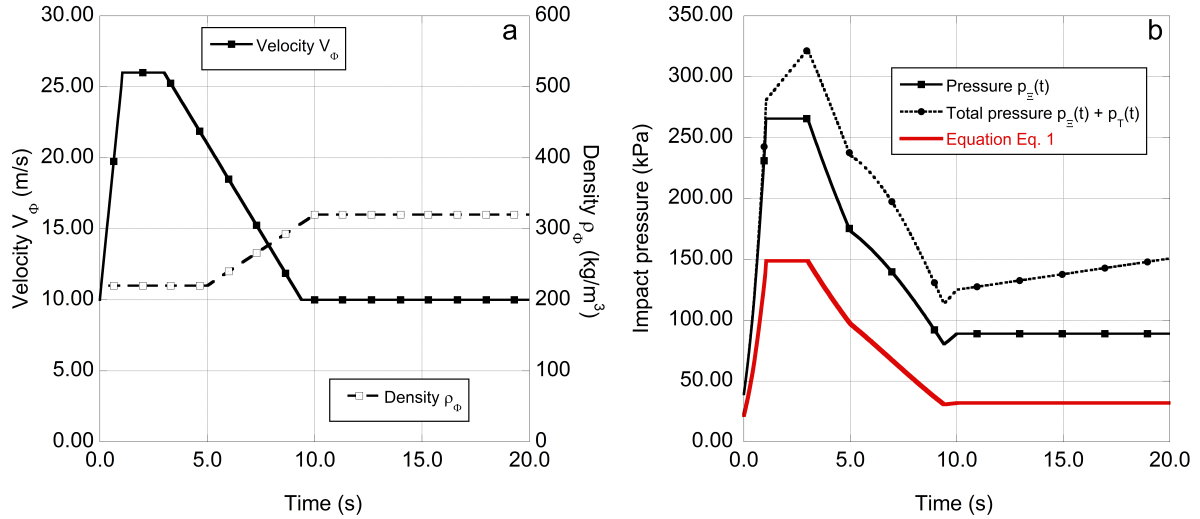

**Figure 8.** a) Incoming avalanche velocity  $V_\Phi$  and flow density  $\rho_\Phi$ . b) Calculated impact pressure in the pile-up/accumulation regime considering only the impulsive pressure  $p_\Xi$  for an avalanche with incoming velocity of  $V_\Phi(0) = 26$  m/s. Comparison to standard calculation formula, no traction  $p_T=0$ .

In the second example a high density  $\rho_\Phi(t) > 450$  kg/m<sup>3</sup>, slow moving avalanche  $V_\Phi(t) = 2.5$  m/s with large flow height  $h_\Phi(t) = 5.00$  m strikes a rigid obstacle, Fig. 9a. We consider three cases  $h_\Omega = 5.50$  m,  $h_\Omega = 5.25$  m and  $h_\Omega = 5.00$  m. The calculated impact pressures are shown in Fig. 9b and compared to the standard impact formula (red line,  $C_D = 2$ ). In this example we see the clear role of cohesion in the avalanche core (Bartelt et al., 2015). For highly cohesive flows there is no pile-up extension in the height  $h_\Phi(t) = h_\Omega(t)$  and the impact pressures exceed 100 kPa for a low impact velocity. The equivalent  $C_D$  coefficients for this case is approximately 50. The pressures are significantly smaller when the flows are cohesionless  $h_\Omega > h_\Phi$ . In this case the equivalent  $C_D$  coefficients drop to 10. Clearly, the pressures decrease rapidly when  $h_\Omega(t) > h_\Phi(t)$ . This result underscores the important role of snow quality in the flowing avalanche at the time of impact.

Although we considered a tractive stress in this example, the tractive stresses were small in comparison to the dynamic pressures  $p_T(t) < p_\Xi(t)$ . The flowing avalanche snow does not have a high enough velocity to exert large tractive stresses on the sidewalls of the pile-up zone.

Finally, these two case studies were motivated by impact pressures reported in Sovilla et al. (2016). Thus, a comparison to measured values is possible (we obtain values close to the measurements), However, to apply the model we must make assumptions regarding the flow and compaction densities, as well as the snow quality (possible pile-up height). These data are simply not available (and might never be available). Because measurement data seldom contains information of the upstream pile-up process, including the propagation speed of the compaction front, a direct comparison to measured pressures is at

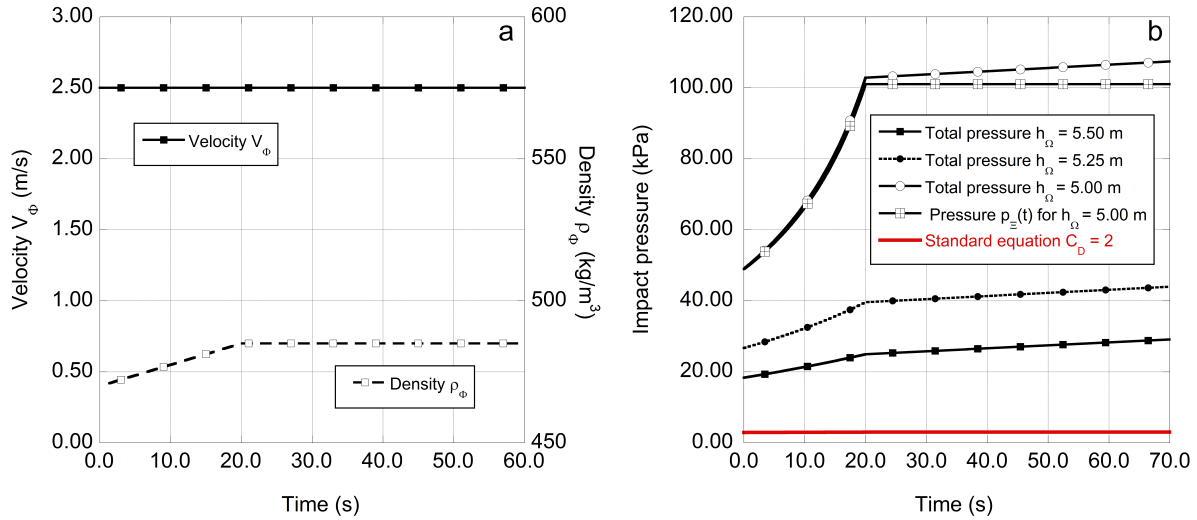

**Figure 9.** a) Incoming avalanche velocity  $V_{\Phi}$  and flow density  $\rho_{\Phi}$  for a dense slow moving avalanche. Avalanche flow height  $h_{\Phi} = 5.00$  m. b) Calculated impact pressure in the pile-up/accumulation regime for different pile up heights  $h_{\Omega} = 5.50$  m,  $h_{\Omega} = 5.25$  m and  $h_{\Omega} = 5.00$  m. Comparison to standard calculation formula (red line).

present helpful, but certainly not conclusive. The examples should motivate experimentalists to capture more upstream data of the stopping process, especially compaction densities and the extent of the deadzone.

### 5.3 Damaged bridge, Mittelbedra Avalanche, Davos

In the final example we demonstrate a salient application feature of the pile-up/accumulation model: to apply it we need to predict the streamwise variation in avalanche flow density. Moreover, the model cannot be applied in conjunction with constant density avalanche dynamics models because these models do not provide any measure of the incoming flow density. Without the flow density it is impossible to find the upstream braking distance and therefore the force acting on the obstacle.

An interesting case study presented itself in January 2018 when a flowing avalanche with model flow volume (30,000 m<sup>3</sup>) struck a highway bridge located near Mittelbedra on Flüelapass road near Davos, Switzerland (Fig. 10). The avalanche destroyed the bridge guardrail over a length of 20m. This is unusual, since bridge guardrails in Switzerland are designed to withstand between 100 kN (10 ton) vehicle impact loadings. These correspond to impact pressures of approximately 100 kPa. The engineering question subsequently arose how could the Mittelbedra avalanche induce such large impact loadings.

Field examinations with drone flights identified the position and size of the avalanche release zone (Fig. 11). Two small slabs released (average release height 1.0m; release volume 10,000 m<sup>3</sup>; release density 300 kg/m<sup>3</sup> at elevation 2100 m). The avalanche descended down a steep gully, entraining snow, before hitting the bridge (elevation 1720 m). The avalanche came

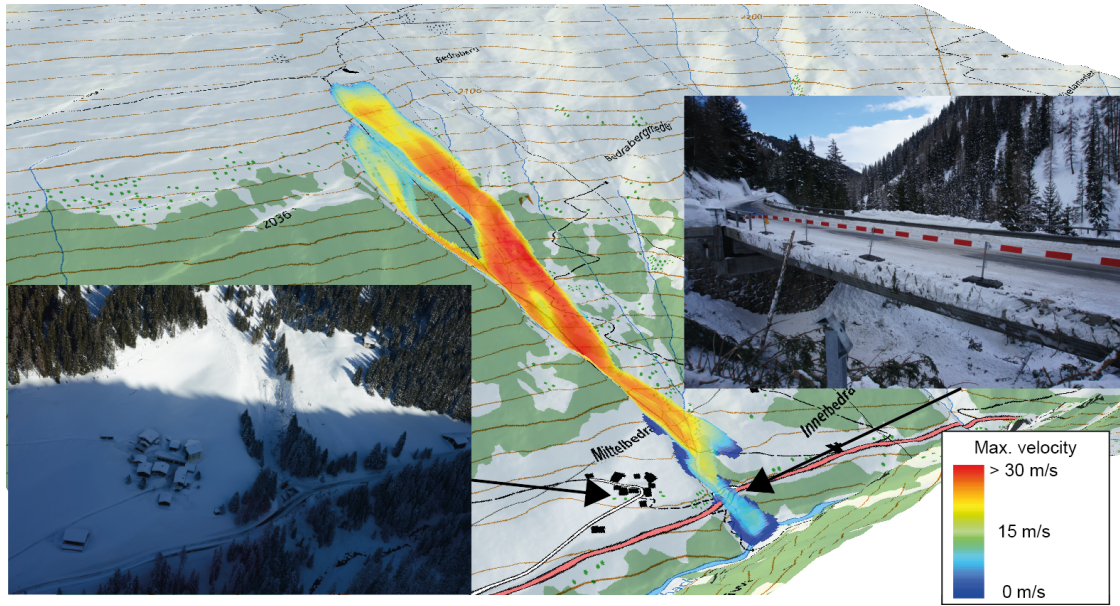

**Figure 10.** Mittelbedra avalanche, Davos. A flowing avalanche struck the highway bridge removing the side guardrail. Avalanche dynamics calculations were performed to estimate the avalanche arrival velocity (12 m/s).

to rest in the stream at the valley bottom, but much snow was piled-up on the bridge, indicating the possibility of some snow accumulation. The piled-up snow was immediately removed by road operation crews.

The field information was used to define the initial and boundary conditions for avalanche dynamics calculations (Christen et al., 2010). A model was applied that predicts streamwise variations in avalanche flow densities (Buser and Bartelt, 2009, 2015; Bartelt et al., 2016). The model was able to reproduce the observed flow path, flow width at the bridge as well as depositions in the stream (Fig. 10). The calculations (using a 2.5 m x 2.5 m grid resolution) indicated that the avalanche was travelling at approximately 12 m/s when it struck the bridge, with a (fluidized) flow height of over 5m, see Fig. 11a (total avalanche volume at impact 30,000 m<sup>3</sup>). This would be enough to fill the bridge overboard. The simulations also revealed that the avalanche was fluidized for much of its flow duration (Fig. 11b), but densities at impact were approximately  $\rho_{\Phi} = 300 \text{ kg/m}^3$ . These flow densities are considered to be smaller than a compaction density. A possible loading case would therefore be that much of the avalanche mass flowed under the bridge, but the upper regions of the flow hit the bridge, began to pile-up, but then because of the high pressures, the guardrail failed and was swept away by the flow.

We calculated the impact pressure by specifying the simulated velocity time history  $V_{\Phi}(t)$  and streamwise density history  $\rho_{\Phi}(t)$ , see Fig. 12a. Assuming that some avalanche mass flowed under the bridge we specified  $h_{\Phi} = 2 \text{ m}$ . We varied the pile-up height at the guardrail:  $h_{\Omega} = 2.0 \text{ m}$ ,  $h_{\Omega} = 2.5 \text{ m}$  and  $h_{\Omega} = 3.0 \text{ m}$ . We therefore considered a highly cohesive and two non-cohesive flow regimes. The calculated impact pressures are shown in Fig. 12b and compared to the standard formula (red line),  $C_D = 2$ . We find peak impact pressures over 250 kPa (25 tons/point loading) for the cohesive impact(Fig. 12b), clearly in excess of the standard pressure formula (50 kPa). This impact pressure is deemed too high; but less cohesive flow regimes can

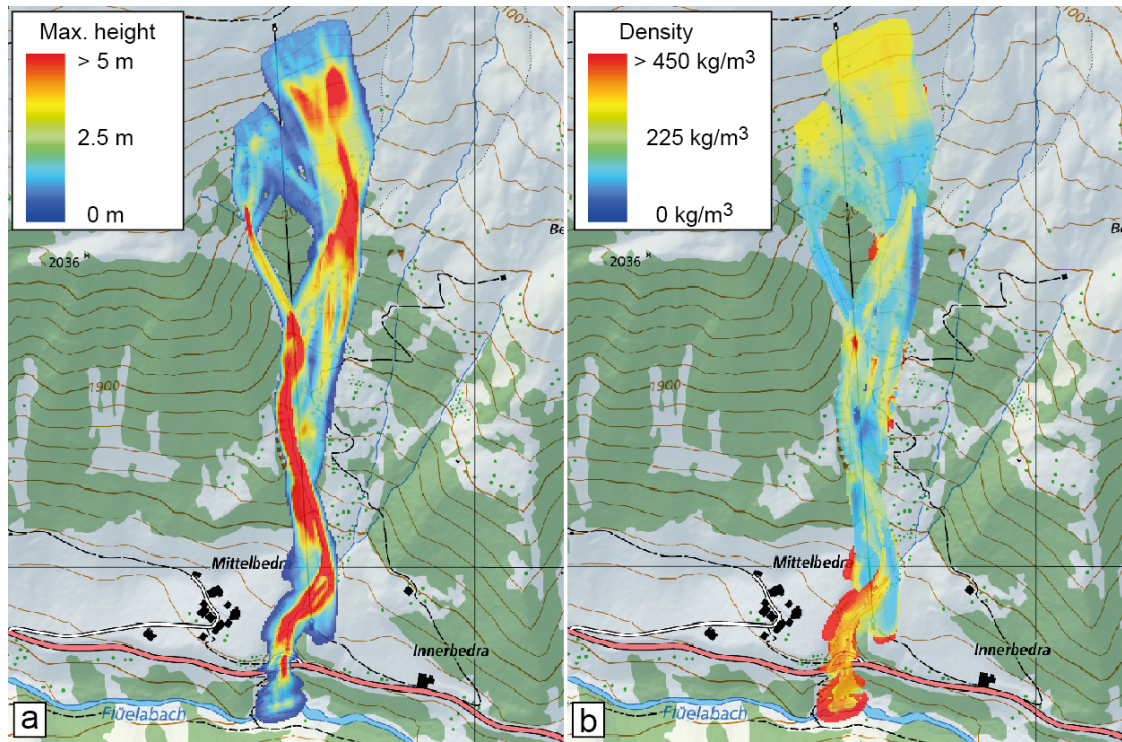

**Figure 11.** Calculated a) flow height and b) flow density of the Mittelbedra avalanche (Davos, Switzerland). The calculated flow heights at the bridge are large enough to fill the overboard such that mass piles-up on the bridge. Although the avalanche was fluidized on much of the avalanche path, calculated avalanche flow densities at the bridge are approximately  $\rho_{\Phi} \approx 300 \text{ kg/m}^3$ .

provide more reasonable impact pressures on the order of 100 kPa (10 tons/point loading). Calculated impact pressures using the standard formula are lower (max 50 kPa).

We emphasize that the investigated pile-up/accumulation loading regime is one possible scenario and demonstrates the dangers of low avalanche approach velocities where solid pile-up is possible. The method should not be applied randomly to all case studies, but only those where mass accumulation is deemed possible.

## 6 Conclusions

The determination of impact pressures on rigid obstacles remains a difficult engineering problem. Here we have provided a mechanical description, based on the assumption of the compaction and densification of avalanche snow, why dynamic impact pressures in the pile-up regime can indeed be large, much larger than expected by standard engineering formulas. The derivation does not rely on any analogy to the propagation of an elastic shockwave (Barbolini et al., 2009; Faug, 2015; Albaba et al., 2018). The pile-up model treats the accumulation of snow in front of the obstacle as a completely plastic process. The proposed method is based on the application of the work-energy theorem and is shown to conserve mass, momentum and

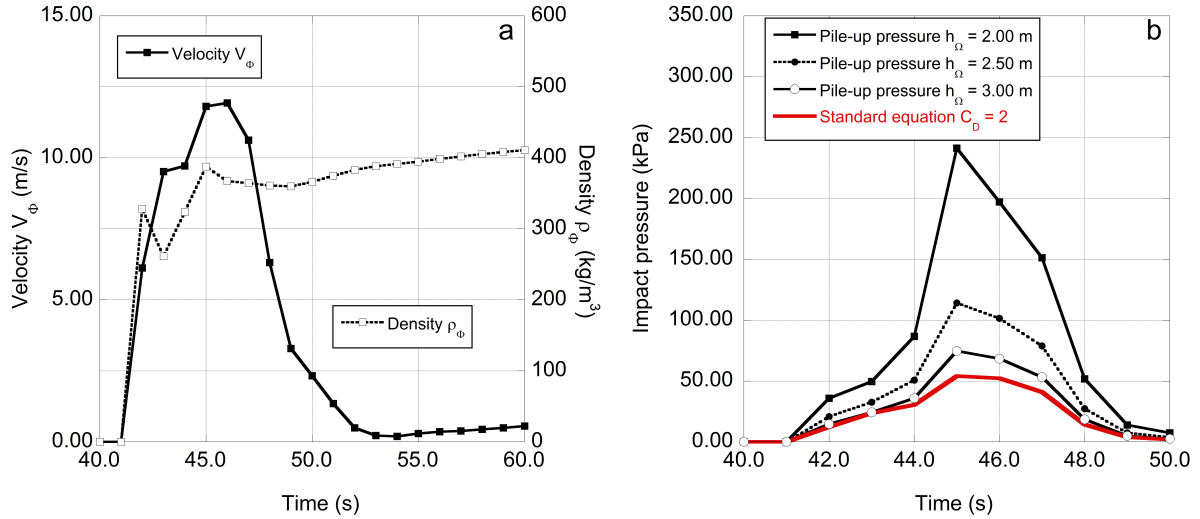

**Figure 12.** Mittelbeda avalanche, Davos. a) Calculated avalanche arrival velocity  $V_{\Phi}(t)$  and density  $\rho_{\Phi}(t)$  b) For a cohesive flow  $h_{\Phi} = h_{\Omega}$ , the calculated peak pressure is more than five times the value predicted by the standard formula (red line). Similar results to the standard formula are obtained when the pile-up height is  $h_{\Omega} = 3.0$  m. Compaction density:  $\rho_{\Omega} = 500 \text{ kg/m}^3$ .

energy. A striking difference between the two model approaches is that the prediction of the pile-up speed which is associated with the deceleration of the compacting mass. We find non-physical braking distances for the "shockwave" model ( $d_{\Xi \rightarrow \Omega} \leq 0$  for  $X \leq 2$ ). Braking distances for the work-energy approach are all positive ( $d_{\Xi \rightarrow \Omega} > 0$ ) for magnification factors greater than zero  $X > 1$ .

- 5 The condition to create large dynamic pressures for slow moving flows is therefore intimately related to the plastic deformation of avalanche snow and the formation of a pile-up/accumulation zone at the upstream face of the impacted obstacle. In this case the induced pressure  $p_{\Xi}$  cannot be represented by the Froude number, rather the ratio of the density of the incoming snow  $\rho_{\Phi}$  to the ultimate compacted snow density  $\rho_{\Omega}$ . We find for  $h_{\Phi} = h_{\Omega}$ ,

$$p_{\Xi}(t) = \left[ 1 - \frac{\rho_{\Phi}}{\rho_{\Omega}} \right]^{-1} \rho_{\Phi} V_{\Phi}^2(t). \quad (25)$$

- 10 High density flows (that is typically slow moving flows) will exert large pressures when the snow cannot be compacted. In fact, in the theoretical case  $\rho_{\Phi} = \rho_{\Omega}$ , the impact pressure is infinite, because the braking distance reduces to zero. The braking distance, and therefore the magnitude of the force exerted on the obstacle, is directly related to the densification of the avalanching snow. Fortunately avalanche snow is a compactible material and the impact pressures are finite. Increasing the pile-up height  $h_{\Omega}$  will reduce the applied pressure. Thus, cohesive flows which exhibit strong material bonding will exert higher
- 15 impact pressures on structures. The explanation why flows with low Froude numbers exhibit correspondingly higher pressures

is that these flows are simply denser, and their slow movement facilitates the formation of a pile-up zone. It is reassuring that the equivalent  $C_D$  values we calculate

$$C_D = 2 \frac{h_\Phi}{h_\Omega} \left[ 1 - \frac{\rho_\Phi h_\Phi(t)}{\rho_\Omega h_\Omega} \right]^{-1}. \quad (26)$$

are directly comparable to values derived from experimental observations (Sovilla et al., 2008, 2016). Avalanche dynamics models will need to predict streamwise variations in avalanche flow density in order to calculate impact pressures for the pile-up/accumulation regime (Buser and Bartelt, 2015; Bartelt et al., 2016).

Another important conclusion we make from our analysis is that when avalanche mass accumulates behind structures the impact pressure  $p(t)$  can be generally expressed as a sum of three components,

$$p(t) = p_\Omega(t) + p_T(t) + p_\Xi(t). \quad (27)$$

These components are all interrelated by the geometry of the dead zone which defines both the magnitude of the static pressure  $p_\Omega(t)$  as well as the location of the shearing interfaces and therefore the reaction to the tractive pressures  $p_T(t)$ . In this paper we have considered only one possible geometry: a backfill zone of constant width  $w$  equal to the width of the impacted structure. Our analysis therefore reveals that the total pressure  $p(t)$  in the backfill regime is a complex function of many time-dependent parameters (e.g. incoming avalanche velocity and density) as well as time-independent material parameters describing avalanche snow, specifically the compaction density  $\rho_\Omega$ , the friction in the pile-up zone  $\mu_\Omega$  and the tractive friction on the shear planes  $\tau_T$ . We purposely limited the physical description of each pressure component ( $p_\Omega(t), p_T(t), p_\Xi(t)$ ) to a *single* constitutive parameter for each process ( $\mu_\Omega, \xi_T, \rho_\Omega$ ). Moreover, even the most simple pressure calculations will require engineers to assume some displacement configuration of the backfill process. This will be difficult, see (Faug et al., 2010) for the example of wedge shaped back-fill regions.

Our final conclusion underscores the limits of on-going field investigations. Our analysis reveals that to validate theories of avalanche impact pressure, field experiments must gather three different types of data using dissimilar measurement devices and techniques. Firstly, pressures sensors must be used to measure the *external forces* that are applied by the avalanche to the structure at impact. Secondly, the *internal stress state* must be ascertained to understand the dynamic response of the structure from the impulsive loading, e.g. (Thibert et al., 2008; Baroudi and Thibert, 2009). To determine the internal stresses within the structure (i.e. failure), dynamic magnification factors must be found which depend on the stiffness and mass distribution of the impacted body. Thirdly, information concerning the *pile-up and stopping process* is needed. This includes the time of formation, density and detailed geometry of the pile-up zone. Perhaps in the near future it will be possible to measure the flow deceleration directly at impact. For example, by placing inertial sensors in the flow (Caviezel et al., 2018). Without this triptych of information it is impossible to link the measured external forces to a specific compaction/deformation mechanism. With the exception of the work of Thibert et al. (2008), the authors do not know any data set that meets all three requirements.

*Acknowledgements.* This work was performed within the framework of the joint Austrian-Swiss project bDFA, a study of avalanche motion beyond the dense flow avalanche regime. We thank the Austrian Academy of Science (ÖAW) for their financial support as well as the Austrian

research partners (Austrian Research Centre for Forests, Torrent and Avalanche Control and the University of Innsbruck). Further support is provided by the on-going WSL research program Climate Change and Mass Movements (CCAMM).

## References

- Albaba, A., S. Lambert and T. Faug, Dry granular impact force on a rigid wall: Analytic shock solution versus discrete element simulations, *Physical Review E*, 97, DOI: 10.1103/PhysRevE.97.052903, 2018.
- Barbolini, M., U. Domaas, T. Faug, P. Gauer, K. Hakonardottir, K. Harbitz, D. Issler, T. Jaohannesson, K. Lied, M. Naaim, The design of  
5 avalanche protection dams and recent practical and theoretical developments, European Commission, Directorate-General for Research, Publication EUR 23339.
- Baroudi, D., B. Sovilla, B. E. Thibert, Effects of flow regime and sensor geometry on snow avalanche impact-pressure measurements, *Journal of Glaciology*, 57(202), 277-288, 2011.
- Baroudi, D., E. Thibert, An instrumented structure to measure avalanche impact pressure: Error analysis from Monte Carlo simulations, *Cold  
10 Regions Science and Technology*, 59(2-3),242-250, 2009.
- Bartelt, P., P. Bebi, T. Feistl, O. Buser, A. Caviezel, Dynamic magnification factors for tree blow-down by powder snow avalanche air blasts, *Natural Hazards and Earth System Sciences*, 18(3), 759-764, 2018.
- Bartelt, P. and O. Buser, Avalanche dynamics by Newton. Reply to comments on avalanche flow models based on the concept of random kinetic energy, *Journal of Glaciology*, 64(243), 165 - 170, 2018.
- 15 Bartelt, P., O. Buser, C. Vera Valero, Y. Bühler, Configurational energy and the formation of mixed flowing/powder snow and ice avalanches, *Annals of Glaciology*, 57(71), 179 - 187, 2016.
- Bartelt, P., C. Vera Valero, T. Feistl, M. Christen, Y. Bühler and O. Buser, Modelling cohesion in snow avalanche flow, *Journal of Glaciology*, 61(229), 837-850, 2015.
- Bartelt, P., J. Glover, T. Feistl, Y. Bühler and O. Buser, Formation of levees and en-echelon shear planes during snow avalanche run-out,  
20 *Journal of Glaciology*, 58(211), 980 - 992, 2012.
- Bozhinskiy, A. N., and Losev, K. S. The fundamentals of avalanche science, *Mitt. Eidgenöss. Inst. Schnee- Lawinenforsch., Davos*. 280 p., 1998.
- Buser O. and P. Bartelt Production and decay of random kinetic energy in granular snow avalanches, *Journal of Glaciology*, 55(189), 3 - 12, 2009.
- 25 Buser O. and P. Bartelt An energy-based method to calculate streamwise density variations in snow avalanches, *Journal of Glaciology*, 61(227), 563 - 575, 2015.
- Caviezel, A., M. Schaffner, L. Cavigelli, P. Niklaus, Y. Bühler, P. Bartelt, M. Magno, L. Benini, Design and evaluation of low-powder sensor device for induced rockfall experiments, *IEEE Transactions on Instrumentation and Measurement*, 67, 767 - 779, 2018.
- Christen M., J. Kowalski, P. Bartelt RAMMS: Numerical simulation of dense snow avalanches in three-dimensional terrain, *Cold Regions  
30 Science and Technology*, 63(1), 1-14, 2010.
- Clough R.W and J. Penzien, *Dynamics of Structures*, McGraw-Hill Inc, New York, 634p, 1975.
- De Biagi, V., B. Chiaia, B. Frigo, Barbara, Impact of snow avalanche on buildings: Forces estimation from structural back-analyses, *Engineering Structures*, 92, 15-28, 2015.
- Eglit, M., V. Kulibaba, M. Naaim,, Impact of a snow avalanche against an obstacle. Formation of shock waves, *Cold Regions Science and  
35 Technology*, 50(1-3), 86-96, 2007.
- Faug, T., B. Chanut,R. Beguin, M. Naaim, E. Thibert, D. Baroudi, A simple analytical model for pressure on obstacles induced by snow avalanches, *Annals of Glaciology*, 51(54), 1-8, 2010.



- Faug, T., Depth-averaged analytic solutions for free-surface granular flows impacting rigid walls down inclines, *Physical Review E* 92, DOI: 10.1103/PhysRevE.92.062310, 2015.
- Feistl, T., P. Bebi, M. Christen, S. Margreth, L. Diefenbach, P. Bartelt, Forest damage and snow avalanche flow regime, *Natural Hazards and Earth System Sciences*, 15(6), 1275-1288, DOI 10.5194/nhess-15-1275-2015.
- 5 Lang, T. and R. Brown, Snow-Avalanche impact on structures, *Journal of Glaciology*, 25(93), 445-455, 1980.
- McClung, D. and P. Schaerer, Characteristics of flowing snow and avalanche impact pressures, *Annals of Glaciology*, 6, 9-14, 1985.
- Ousset, I., D. Bertrand, M. Brun, E. Thibert, A. Limam, M. Naaim, Static and dynamic FE analysis of an RC protective structure dedicated to snow avalanche mitigation, *Cold Regions Science and Technology*, 112, 95-111, 2015.
- Sovilla, B. M. Schaer, M. Kern, P. Bartelt, Impact pressures and flow regimes in dense snow avalanches observed at the Vallee de la Sionne  
10 test site, *Journal of Geophysical Research-Earth Surface*, 113(F1), DOI: 10.1029/2006JF000688, 2008.
- Sovilla, B., M. Kern, M. Schaer, Slow drag in wet-snow avalanche flow, *Journal of Glaciology*, 56(198), 587 - 592, 2010.
- Sovilla, B. T. Faug, A. Kohler, D. Baroudi, J. Fischer, E. Thibert, Gravitational wet avalanche pressure on pylon-like structures, *Cold Region  
Science and Technology*, 126, 66 - 75, 2016.
- Thibert, E., D. Baroudi, A. Limam, P. Berthet-Rambaud, Avalanche impact pressure on an instrumented structure, *Cold Regions Science and  
15 Technology*, 54(3), 206-215, 2008.
- Thibert, E. and D. Baroudi, Impact energy of an avalanche on a structure, *Annals of Glaciology*, 51(54), 45-54, 2010.
